# Supplementary material for: Aspirin mediates protection from diabetic kidney disease by inducing ferroptosis inhibition
Source: PubMed Central journal article supplement (PMC9749971; doi:10.1371/journal.pone.0279010), 2022-12-14

# Fig1C

Western blot analysis of GPX4, SLC7A11, FTH-1, COX2 and TFR-1 protein expression in cells in the Ctrl and HG groups

COX2

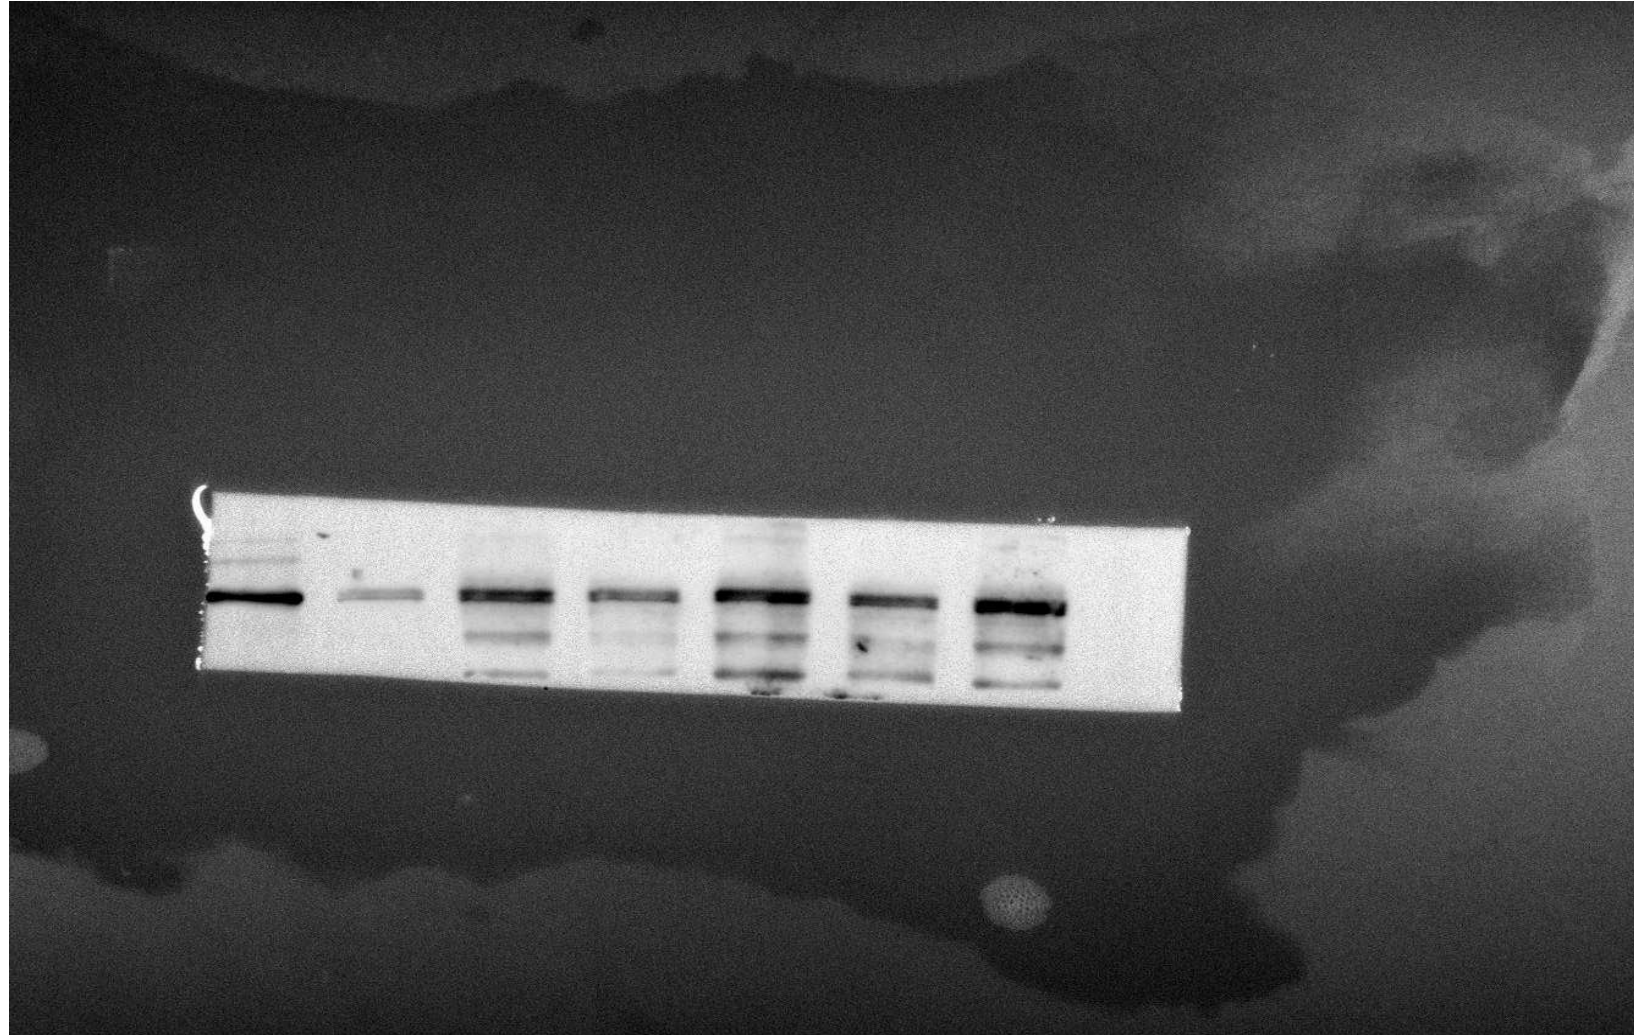

# Fig1C

TFR-1

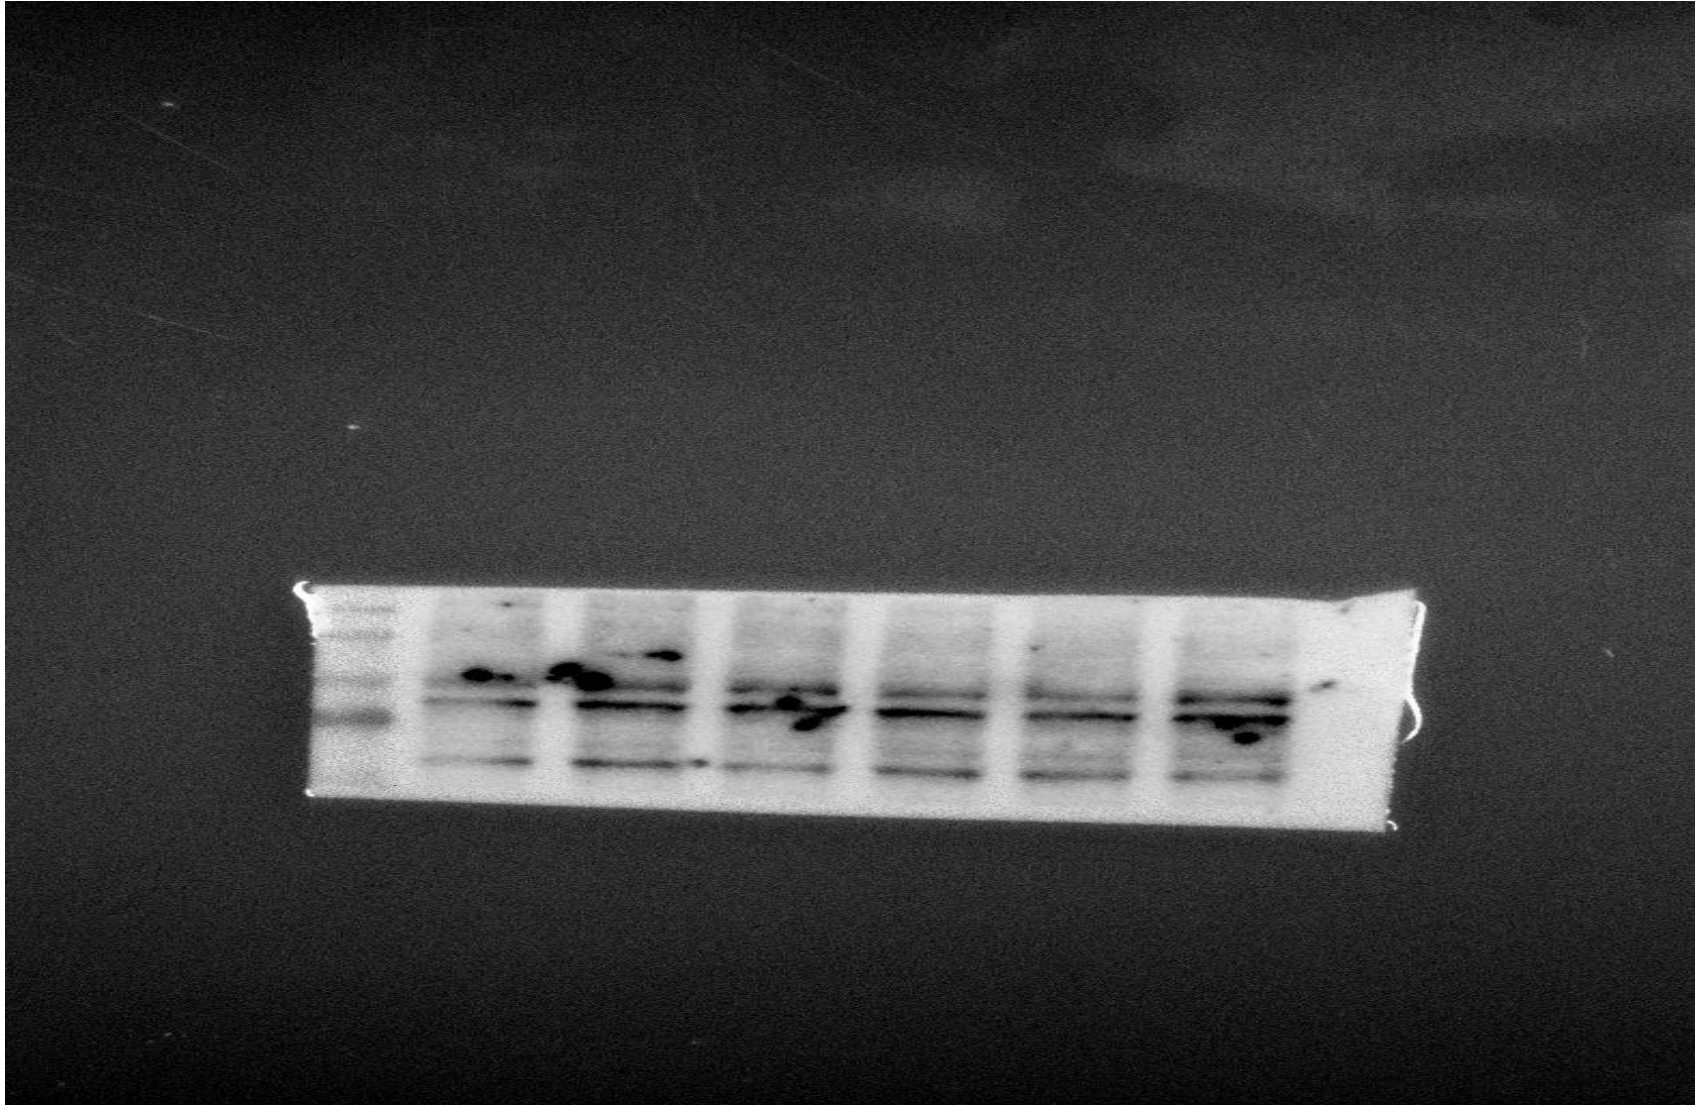

**Fig1C**

SLC7A11

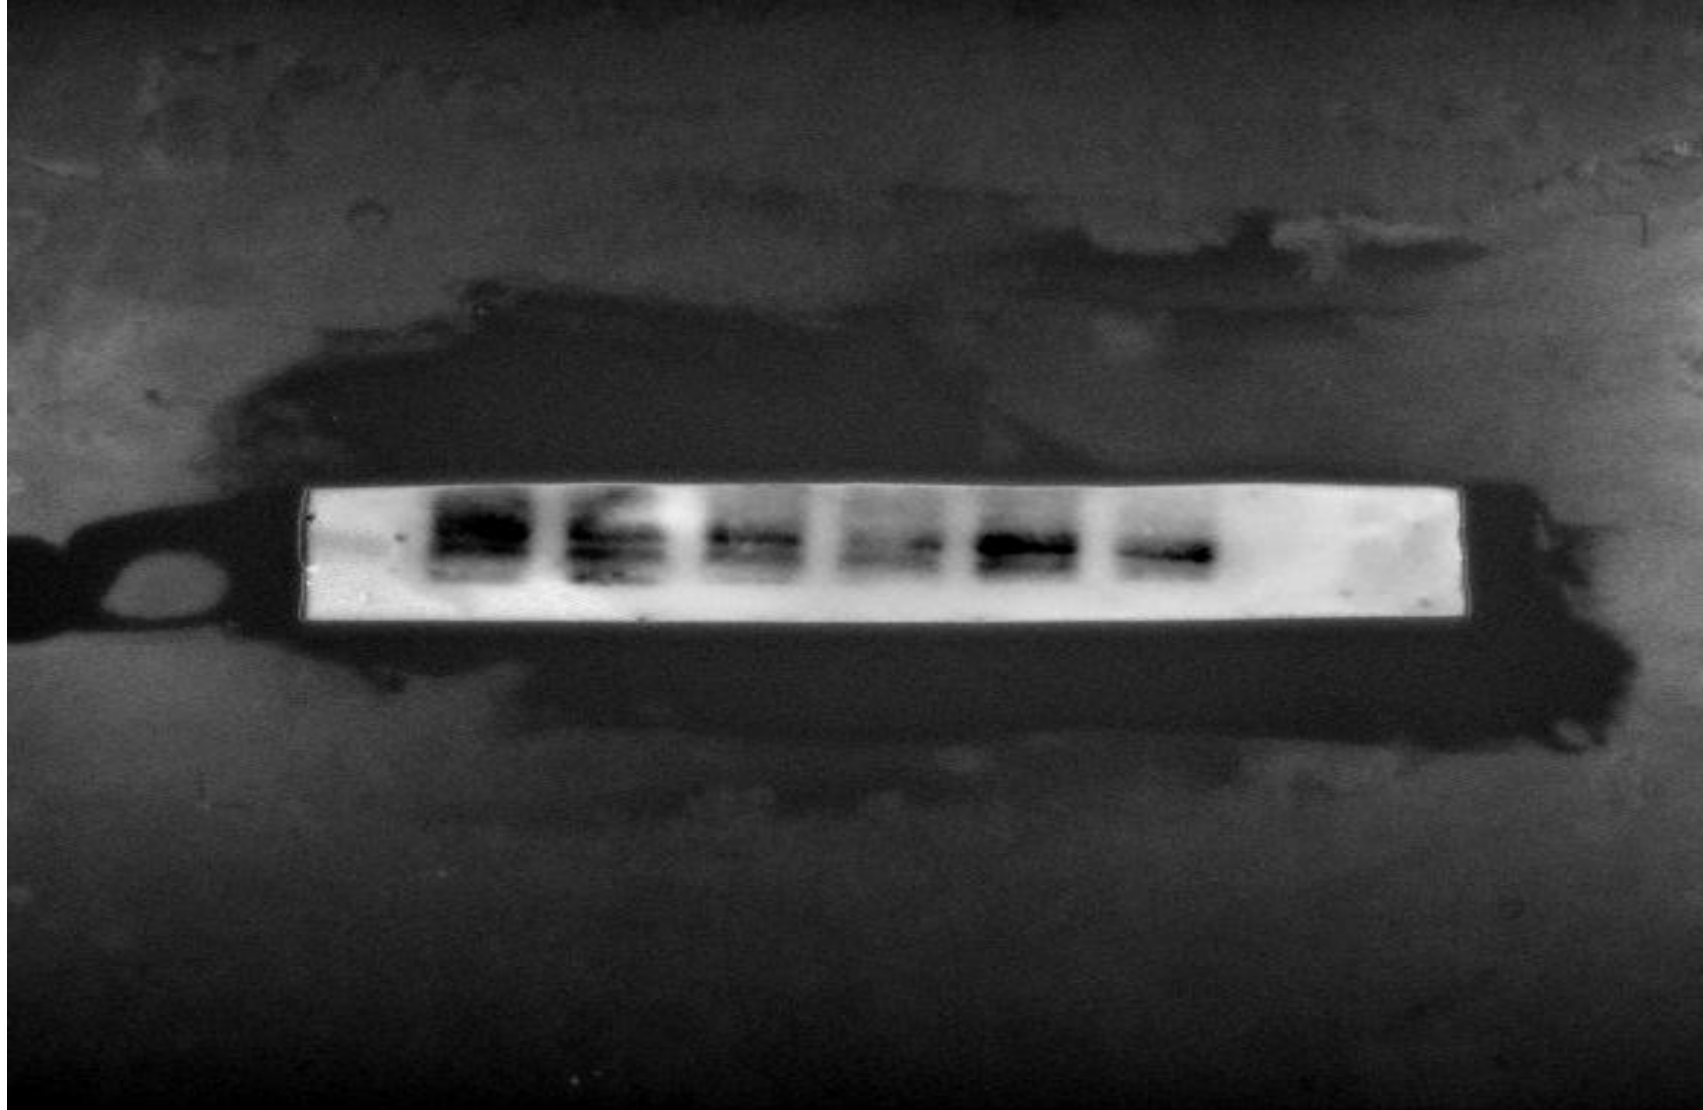

# Fig1C

FTH-1

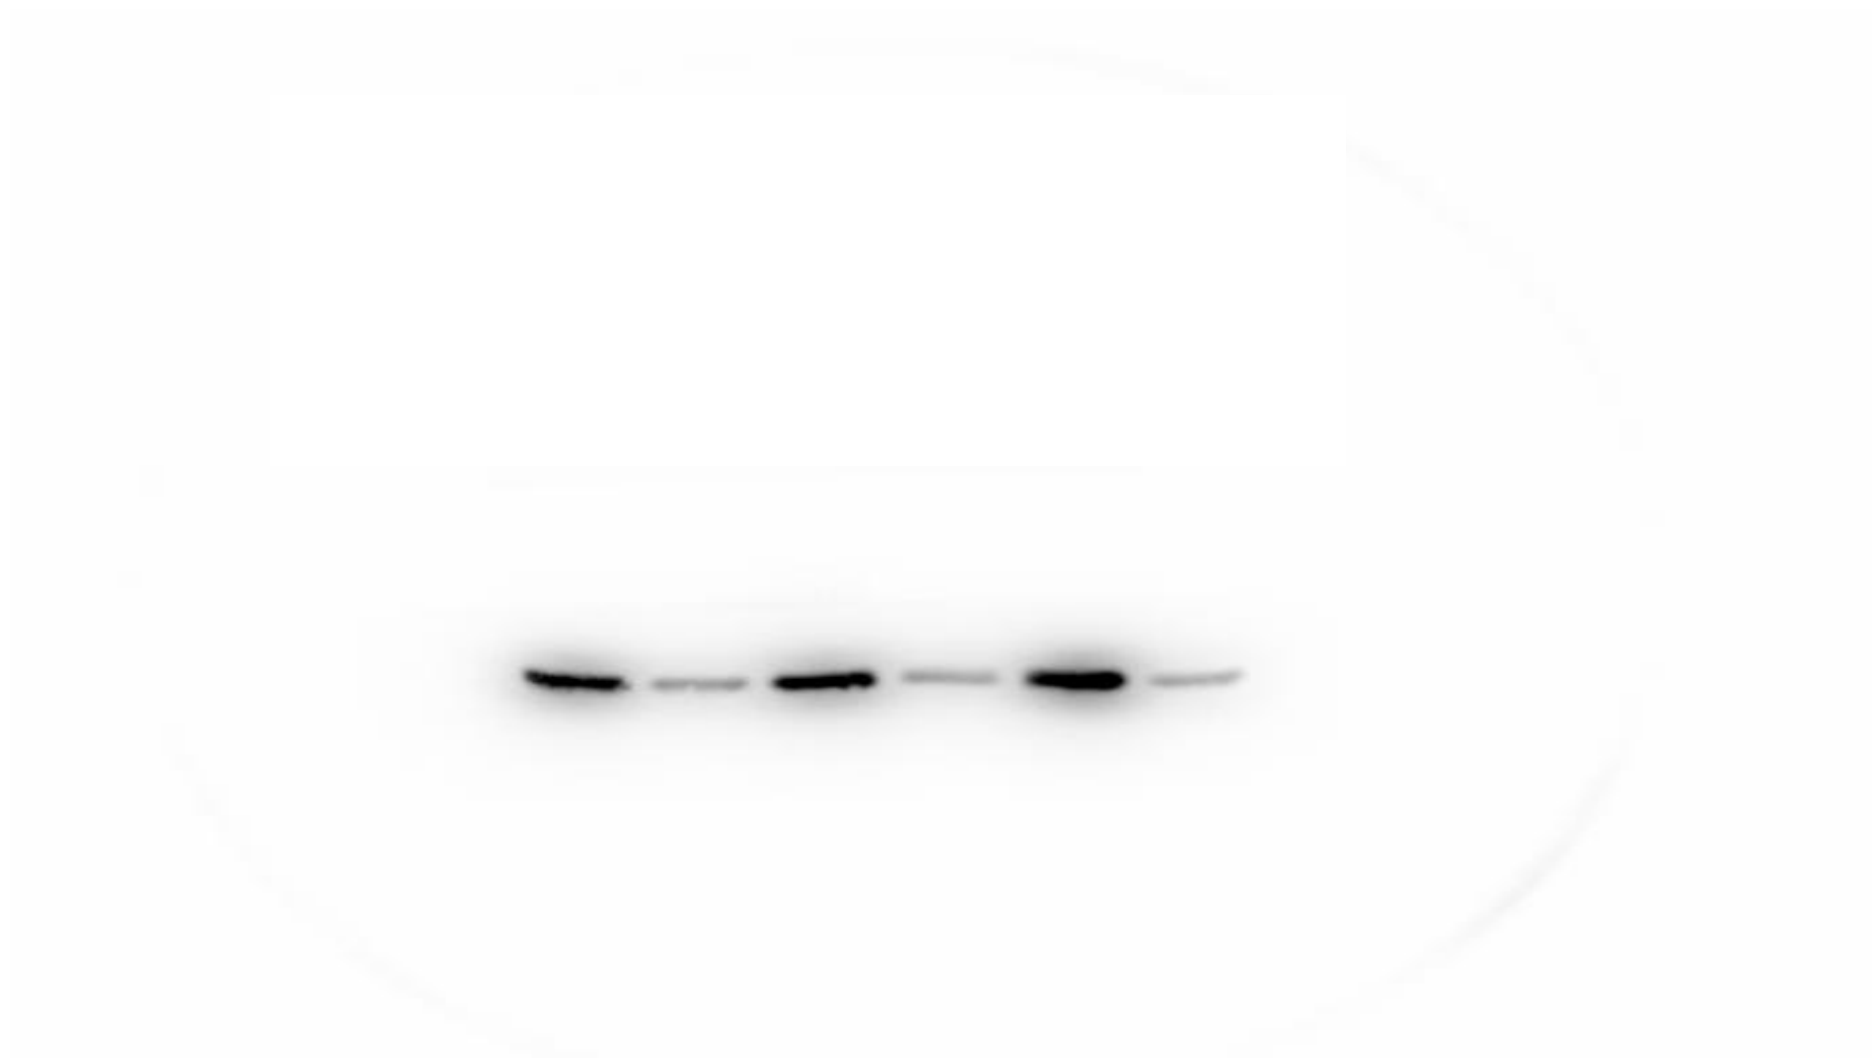

**Fig1C**

GPX4

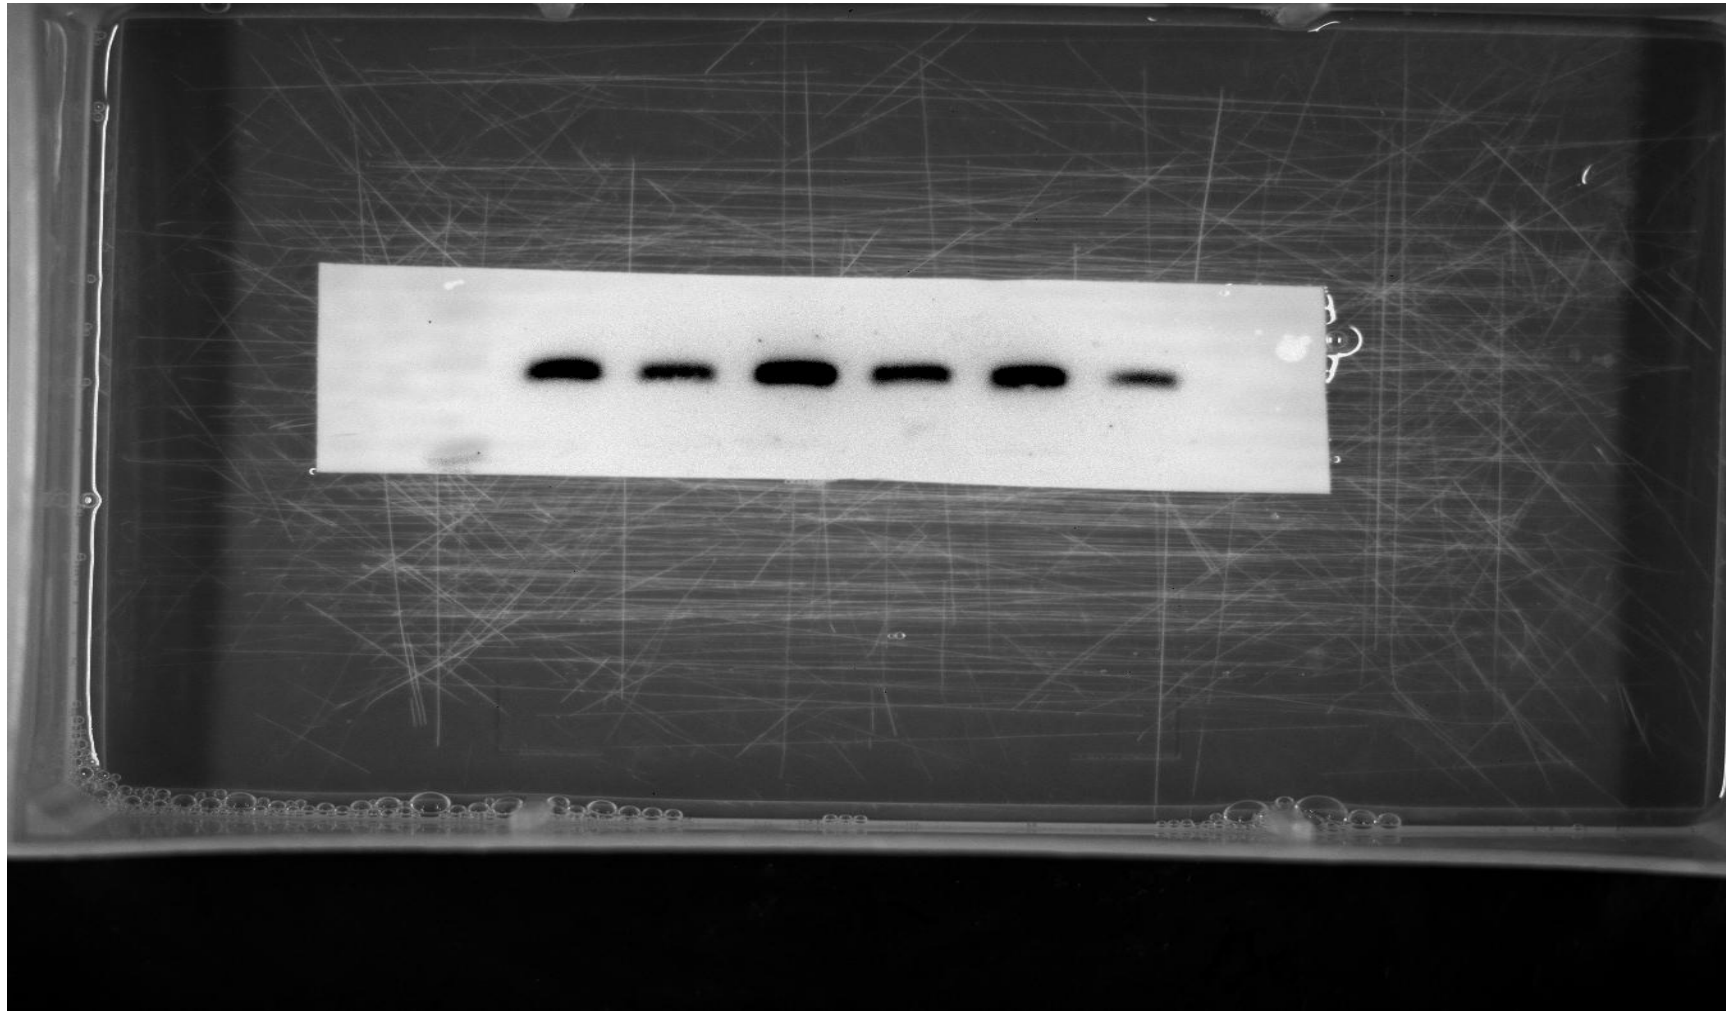

**Fig1C**

GAPDH

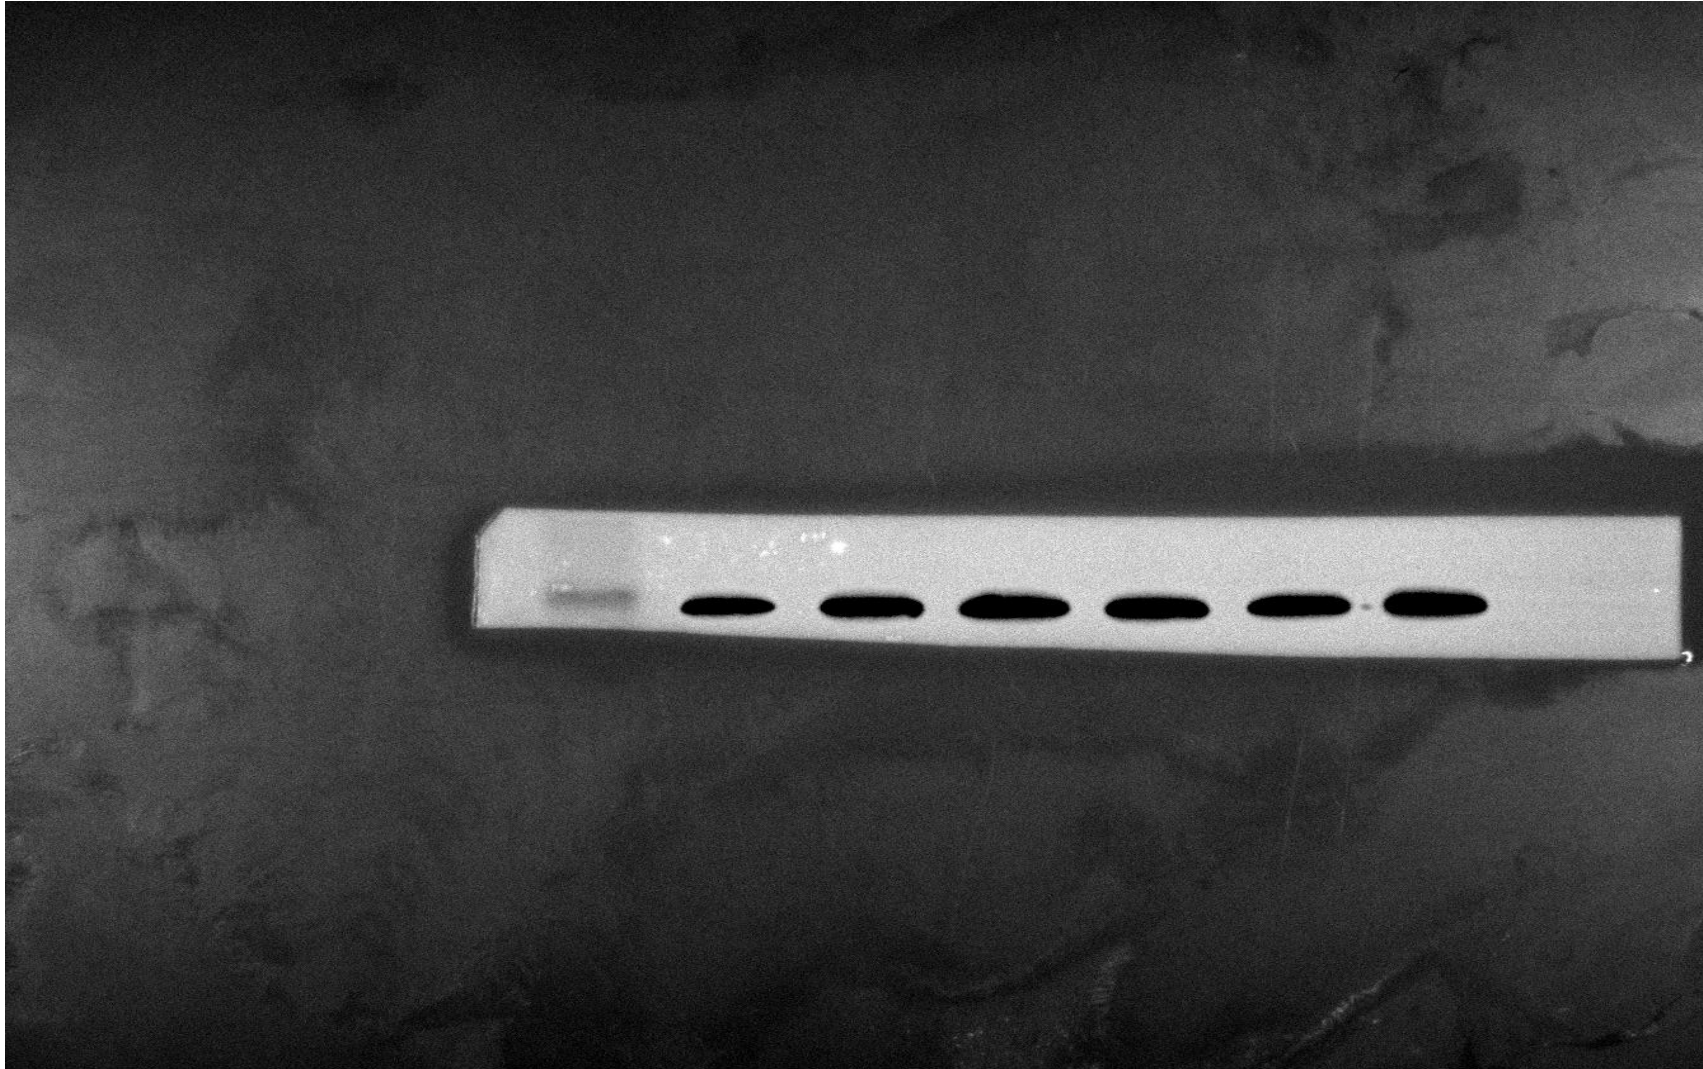

# Fig3B

Western blot analysis and quantification of GPX4, SLC7A11, FTH-1, TFR-1 and COX2 in the kidneys of nondiabetic, diabetic and diabetic mice treated with Fer-1.

COX2

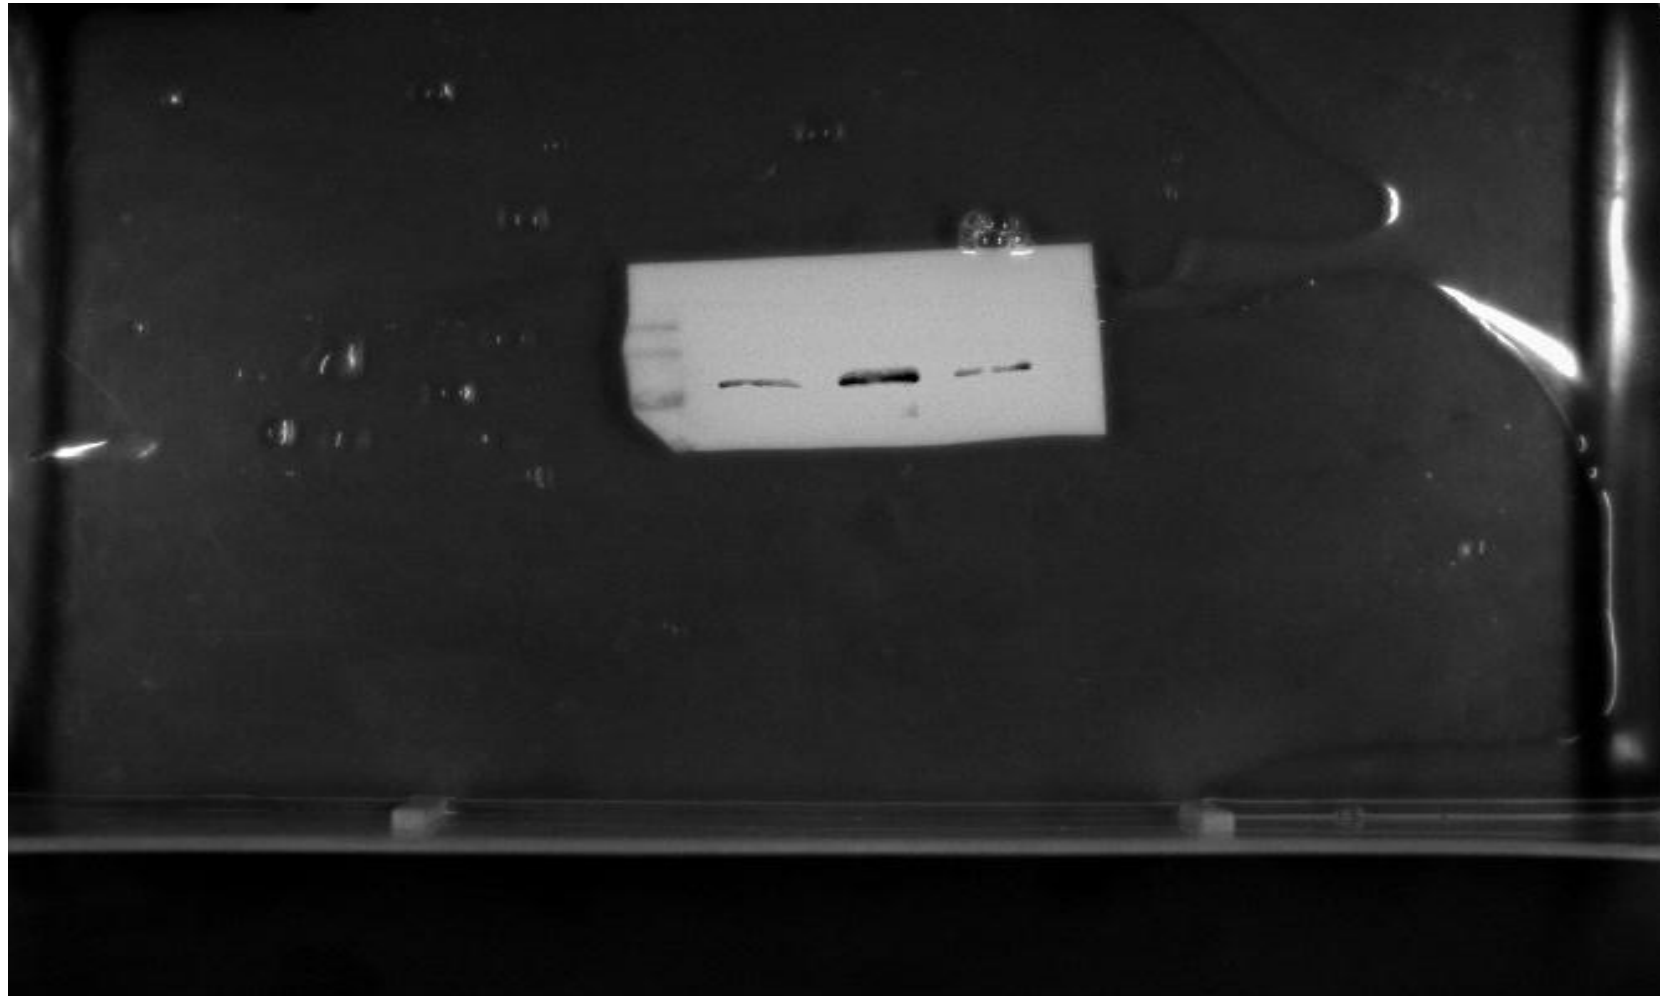

# Fig3B

TFR-1

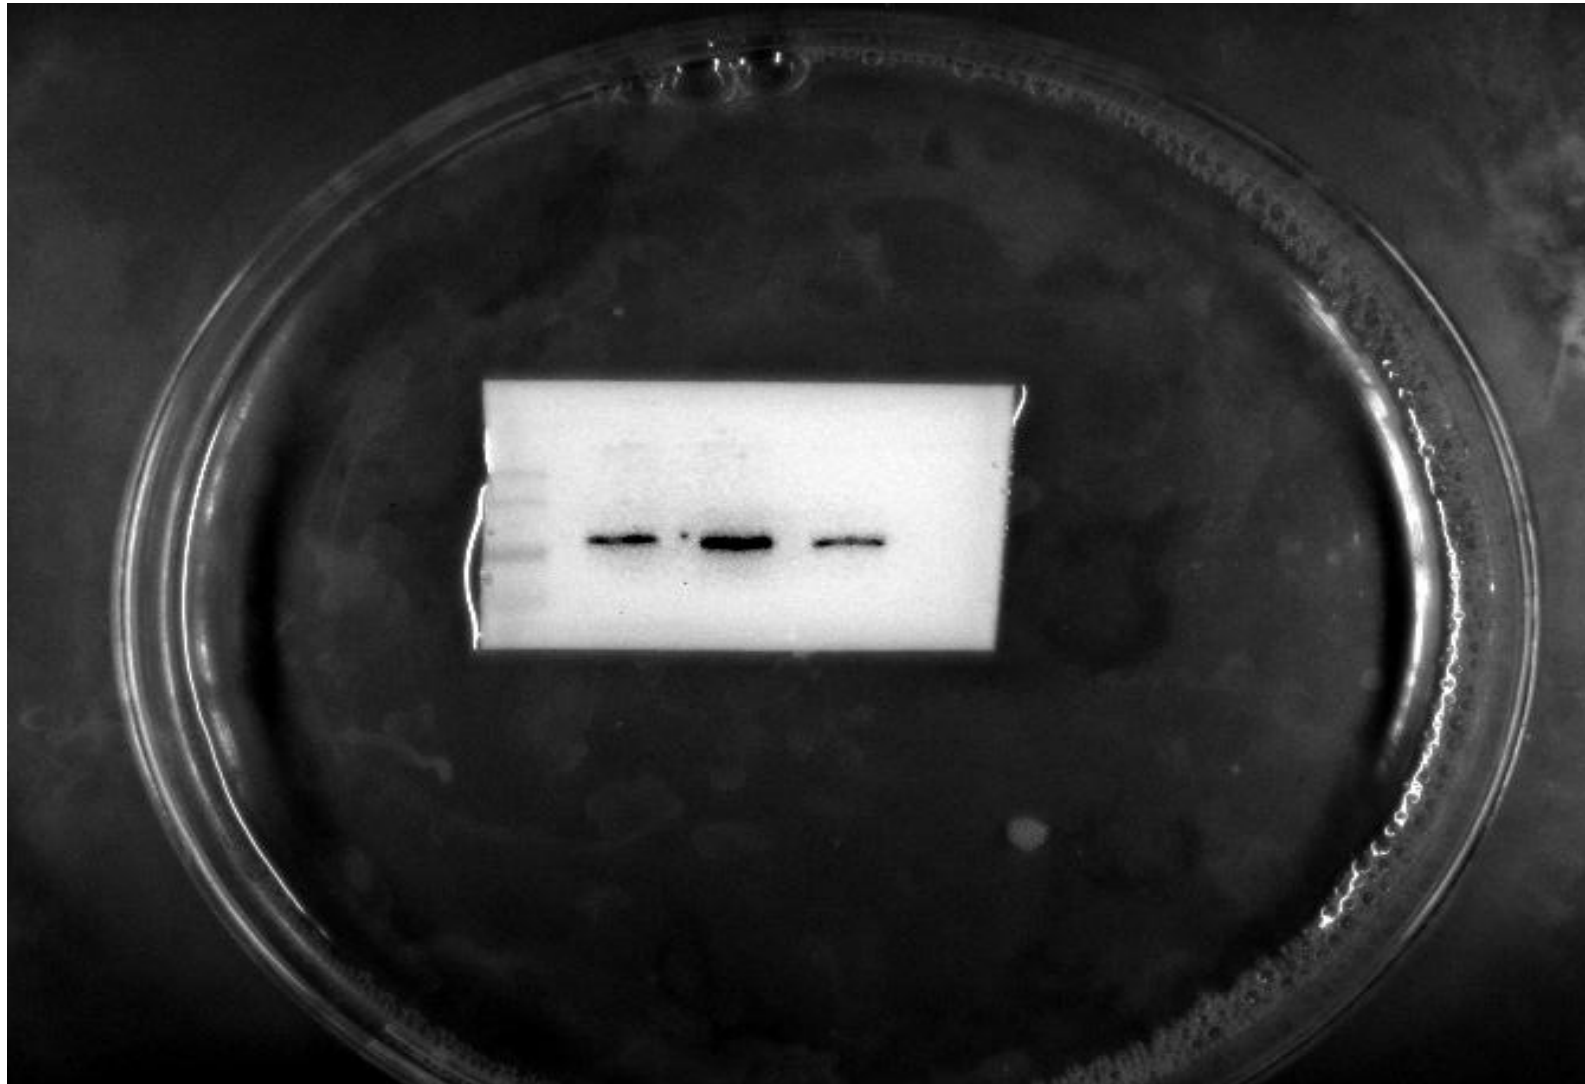



# Fig3B

SLC7A11

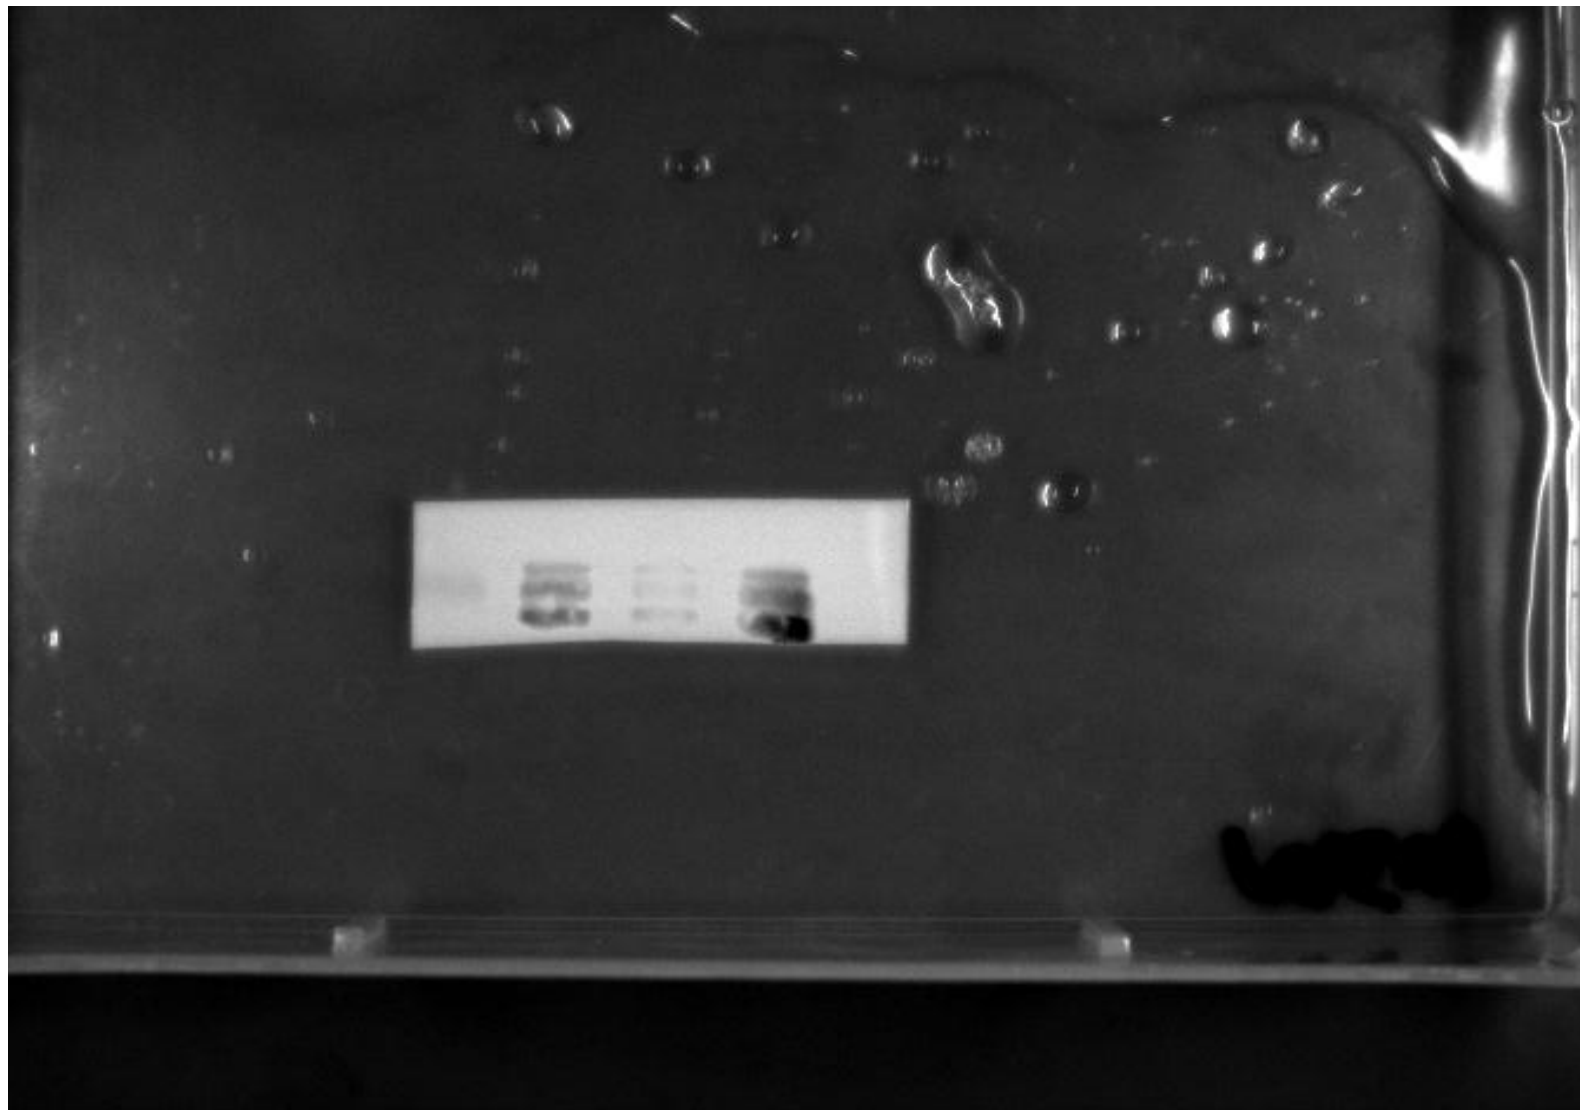

**Fig3B**

FTH-1

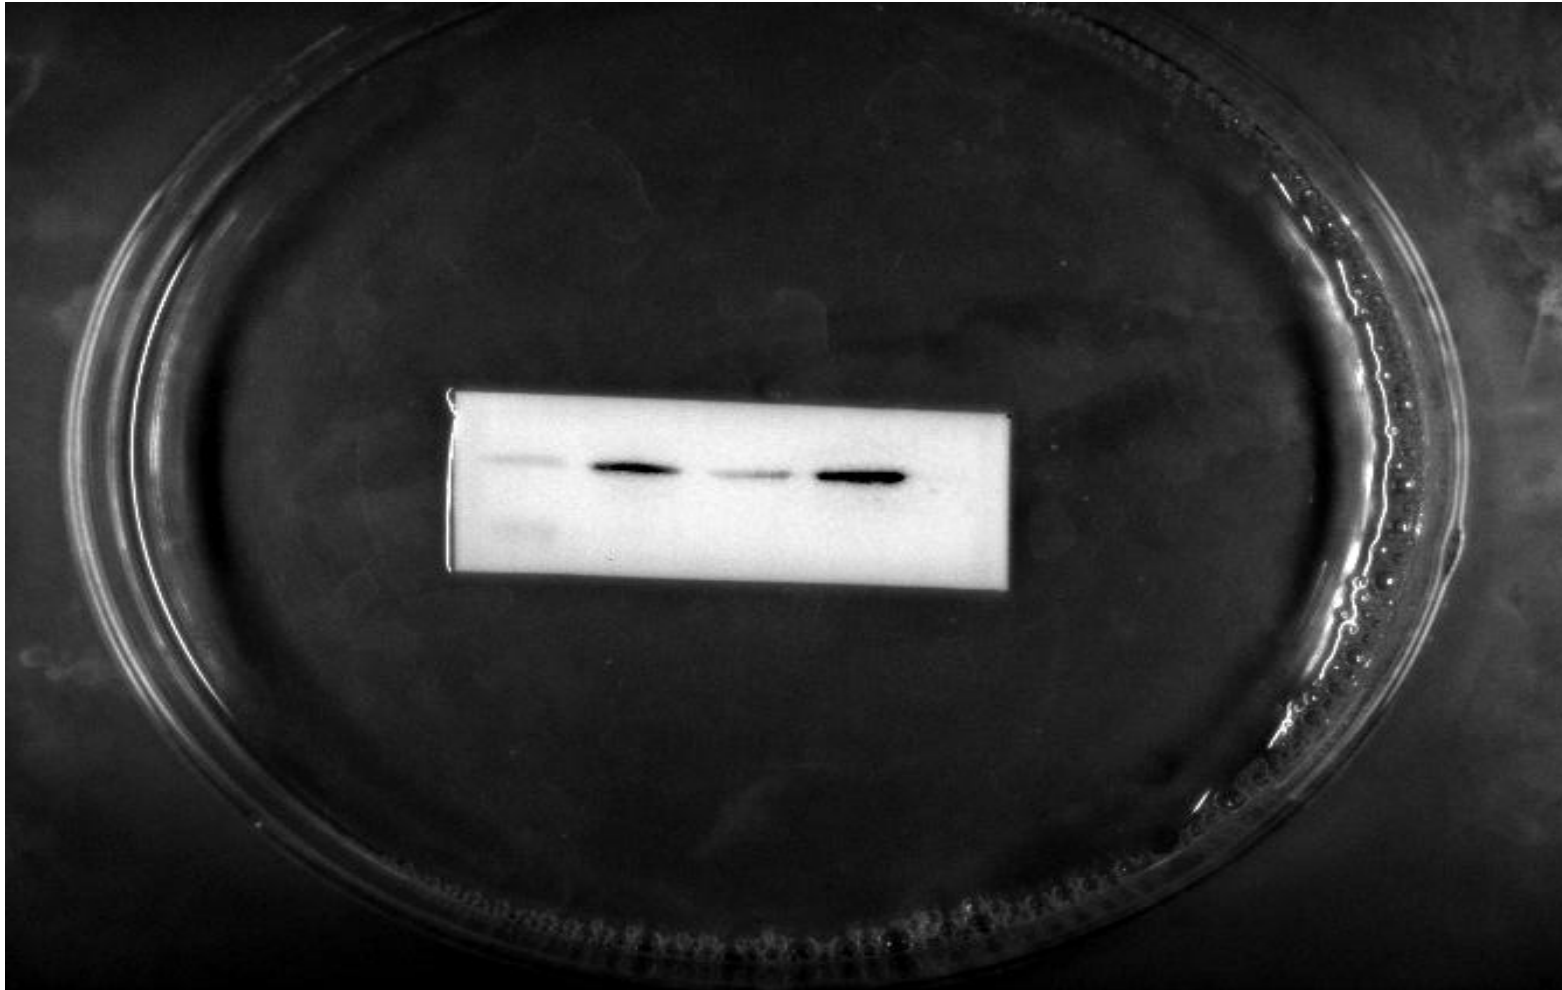

**Fig3B**

GPX4

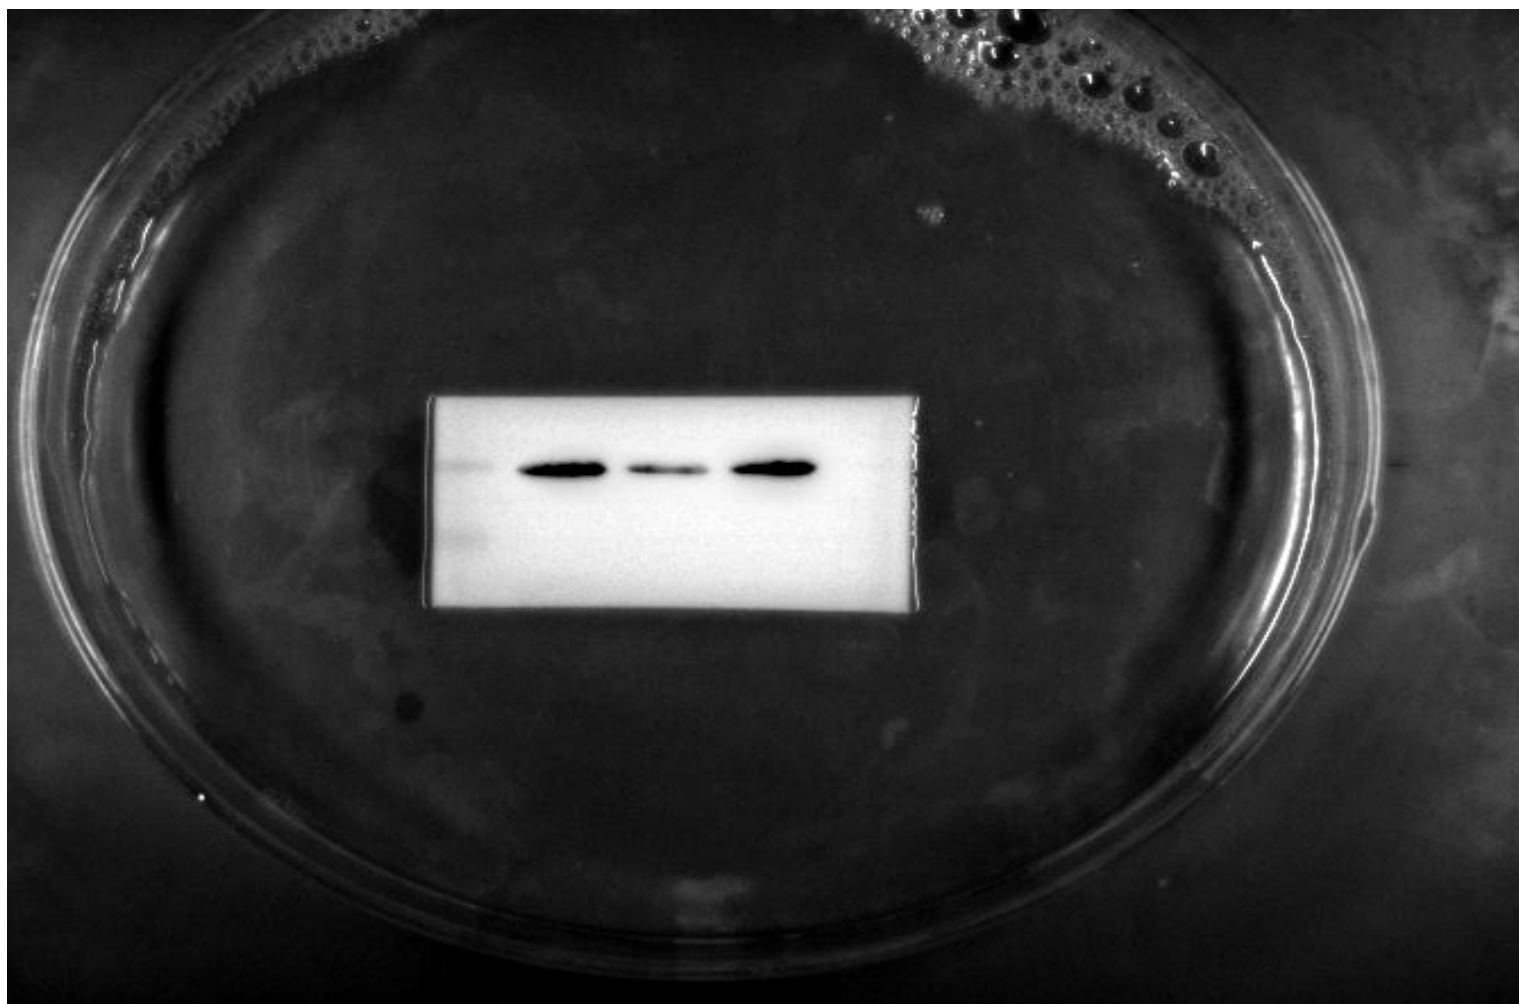

**Fig3B**

GAPDH

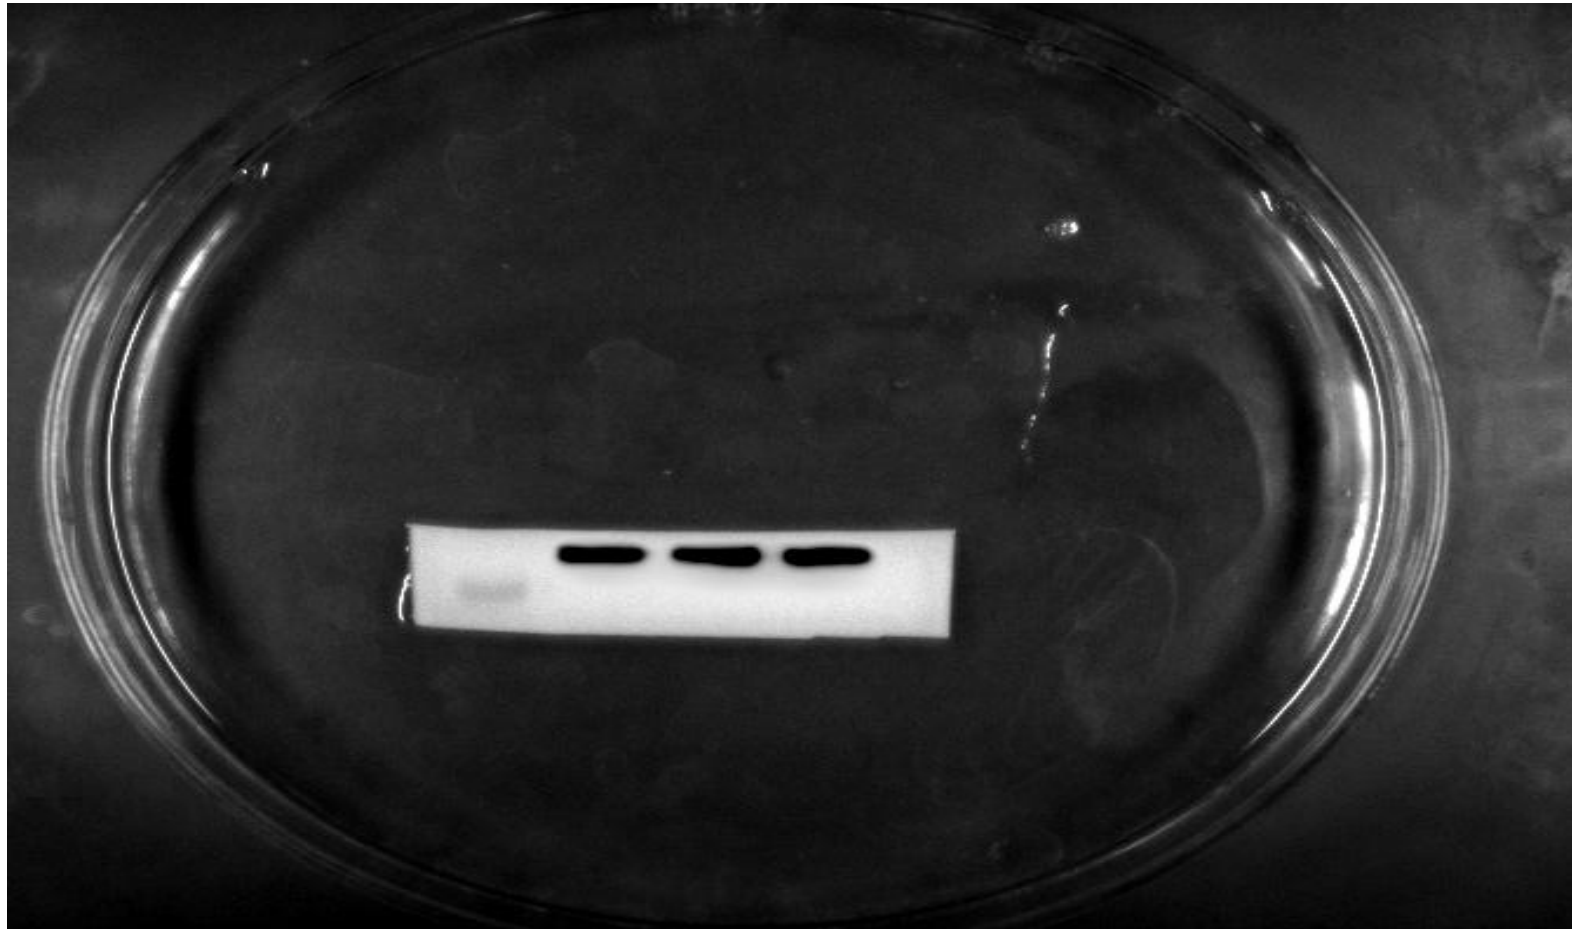

## Fig4B

Western blot analysis of GPX4, SLC7A11, FTH-1, TFR-1 and COX2 protein expression in cells in the Ctrl, HG, Fer-1, DMSO and AS groups.

COX2

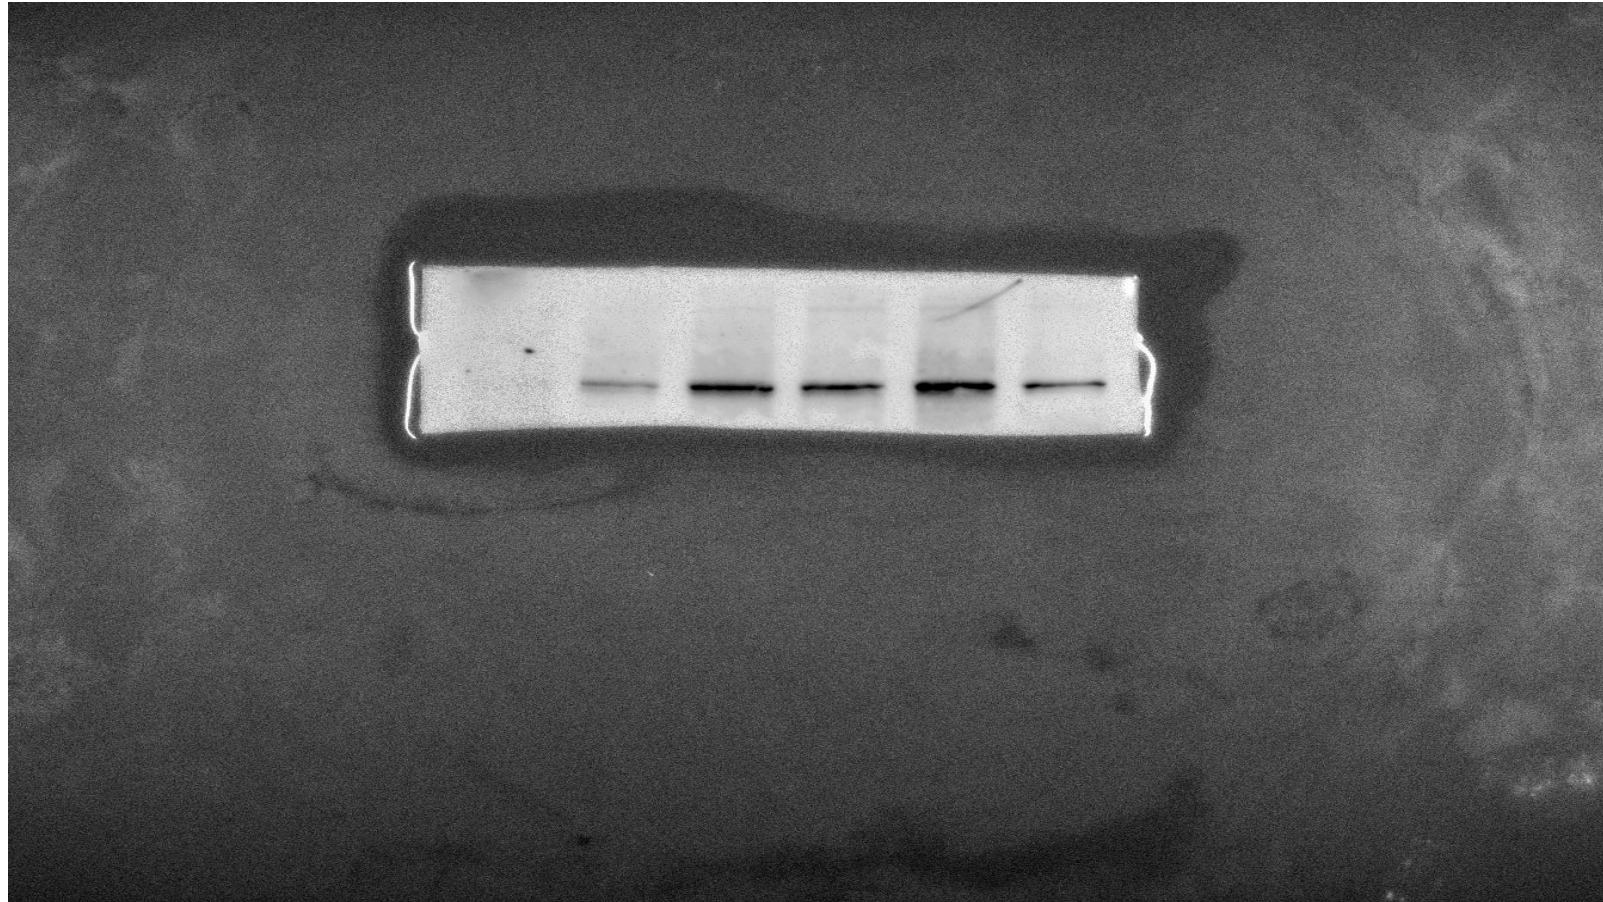

# Fig4B

TFR-1

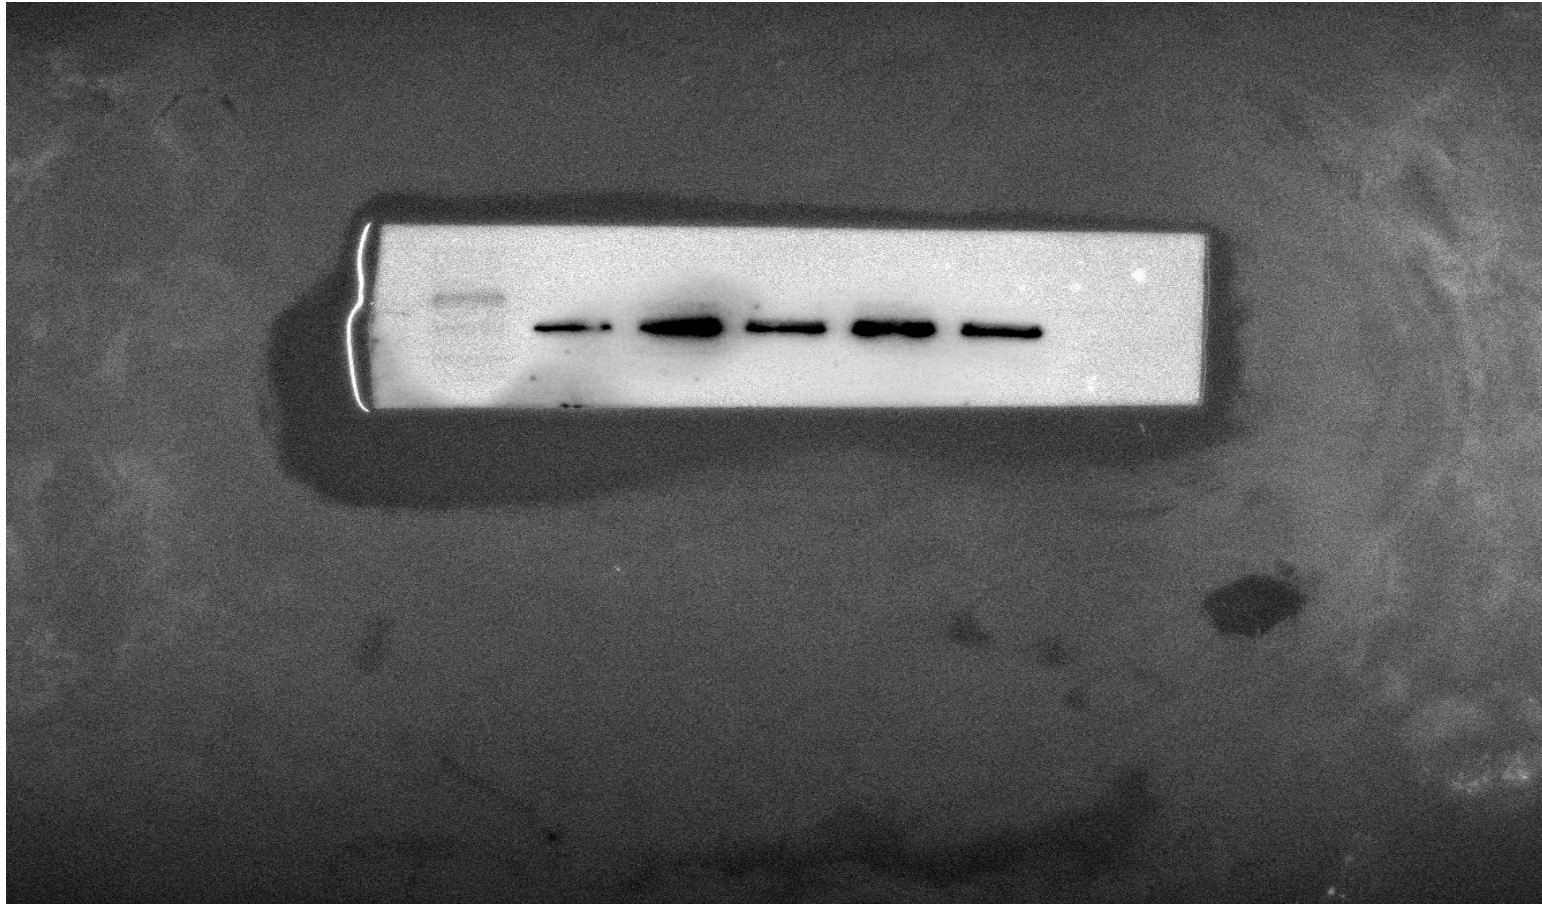

**Fig4B**

SLC7A11

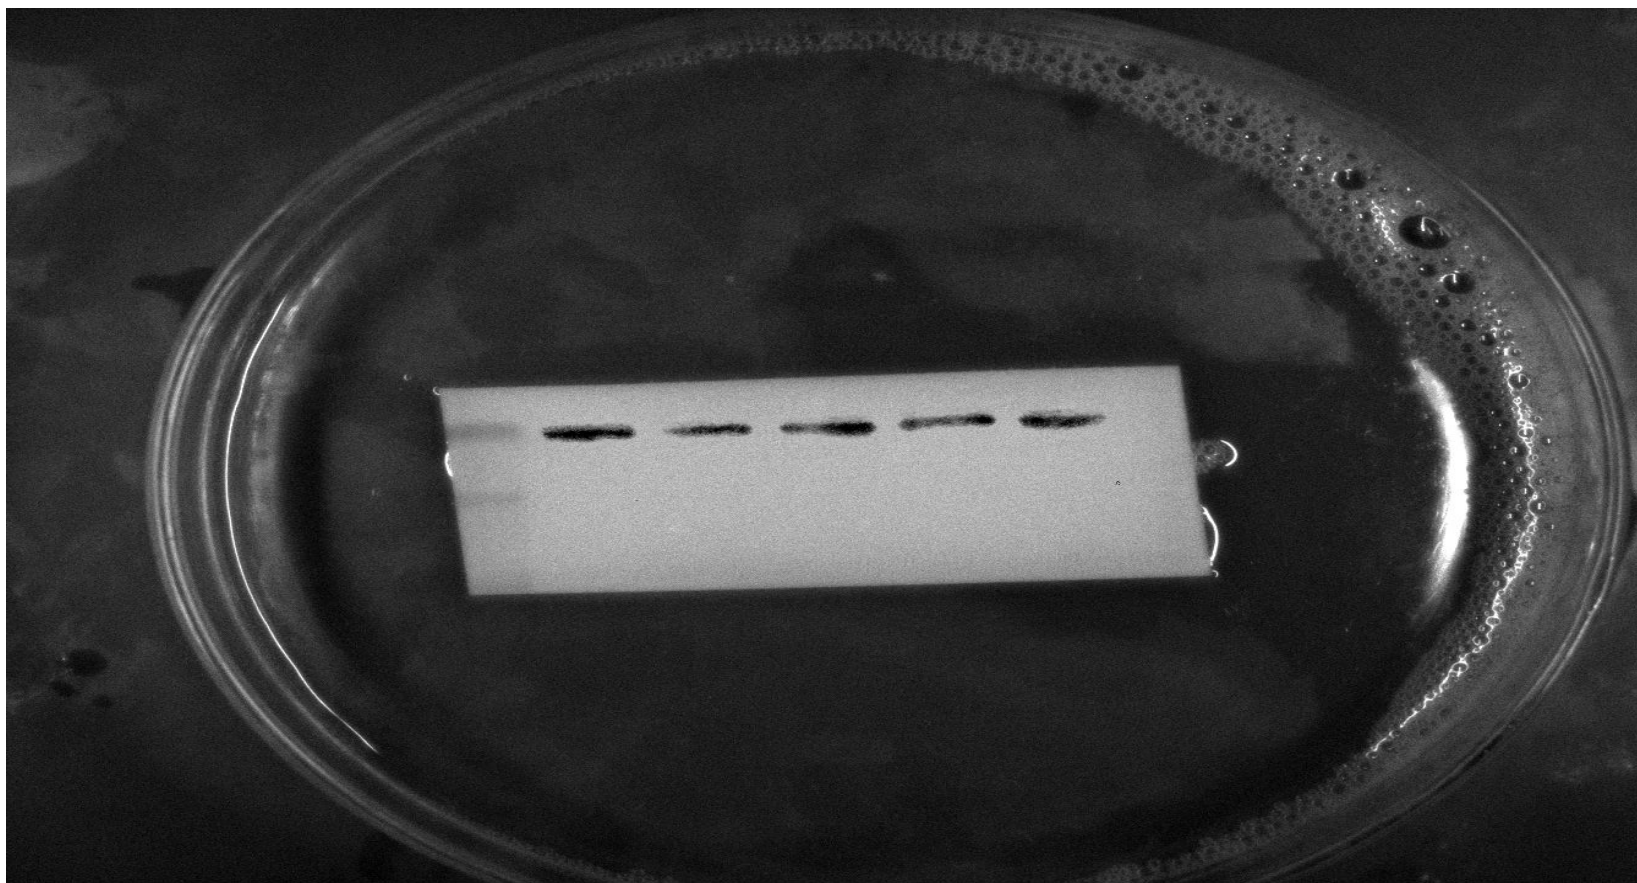

# Fig4B

FTH-1

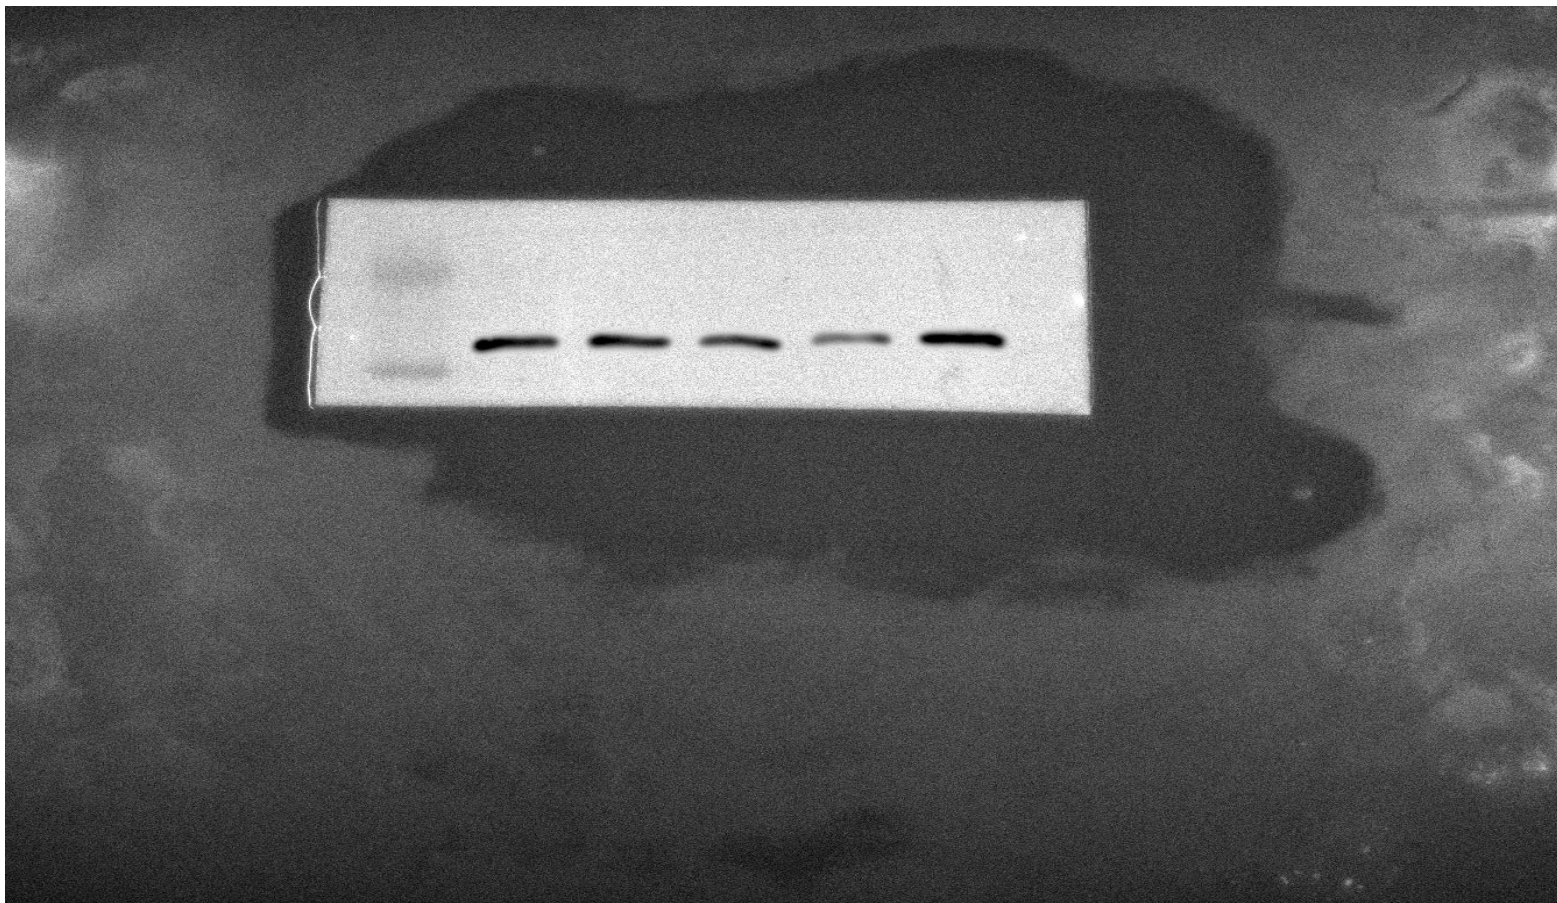



**Fig4B**

GPX4

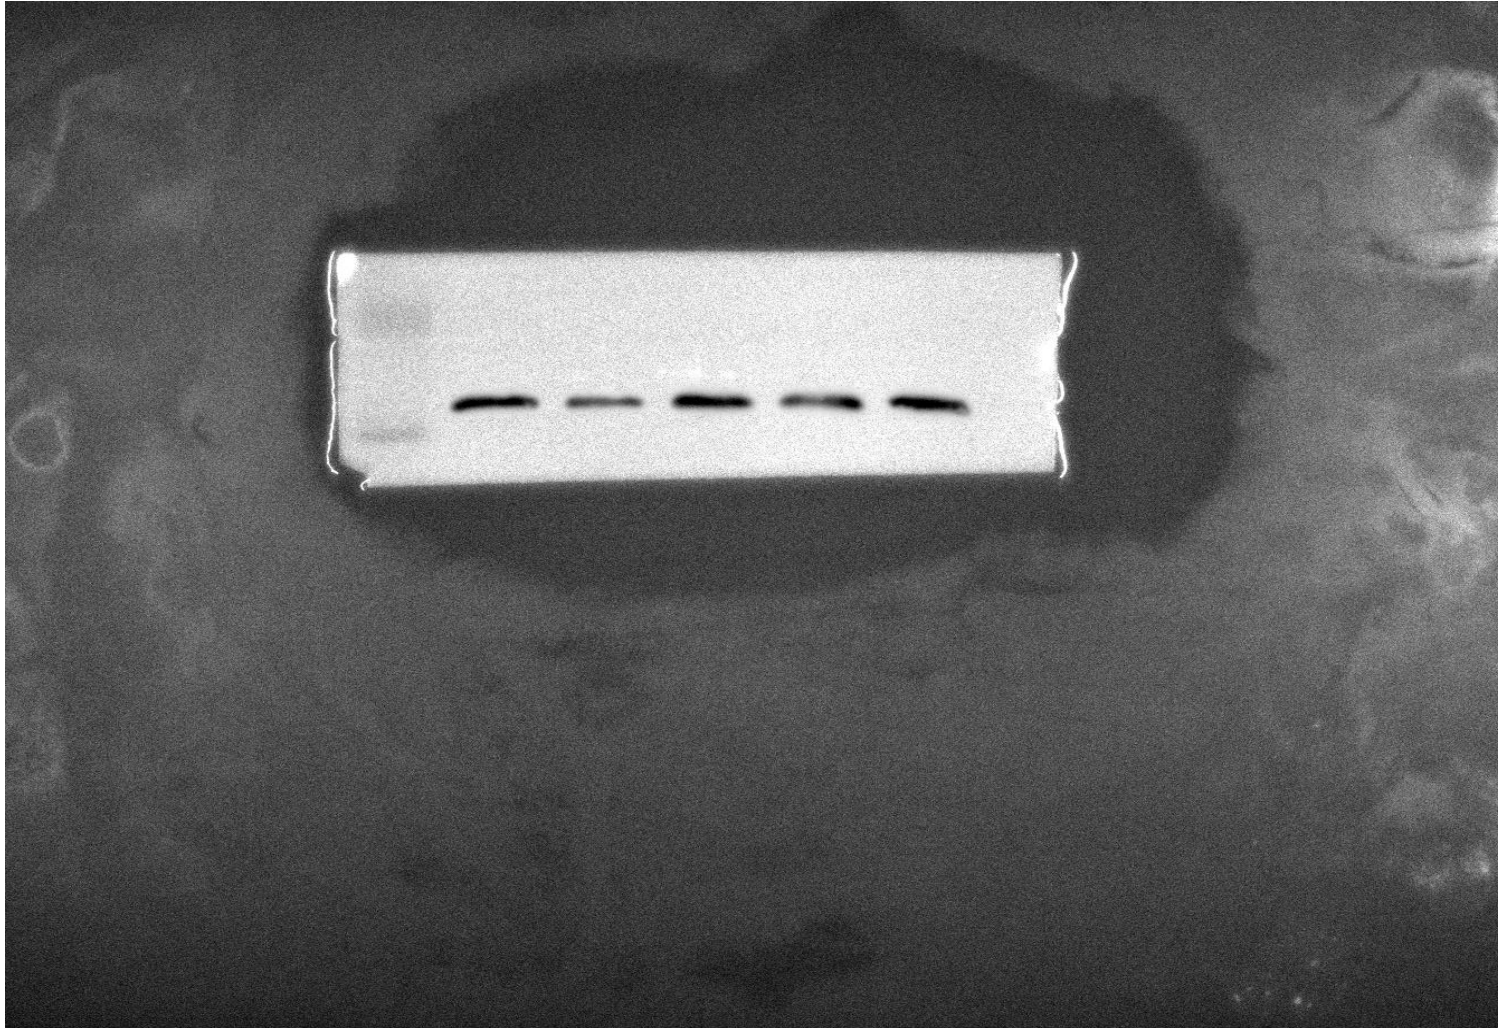

**Fig4B**

GAPDH

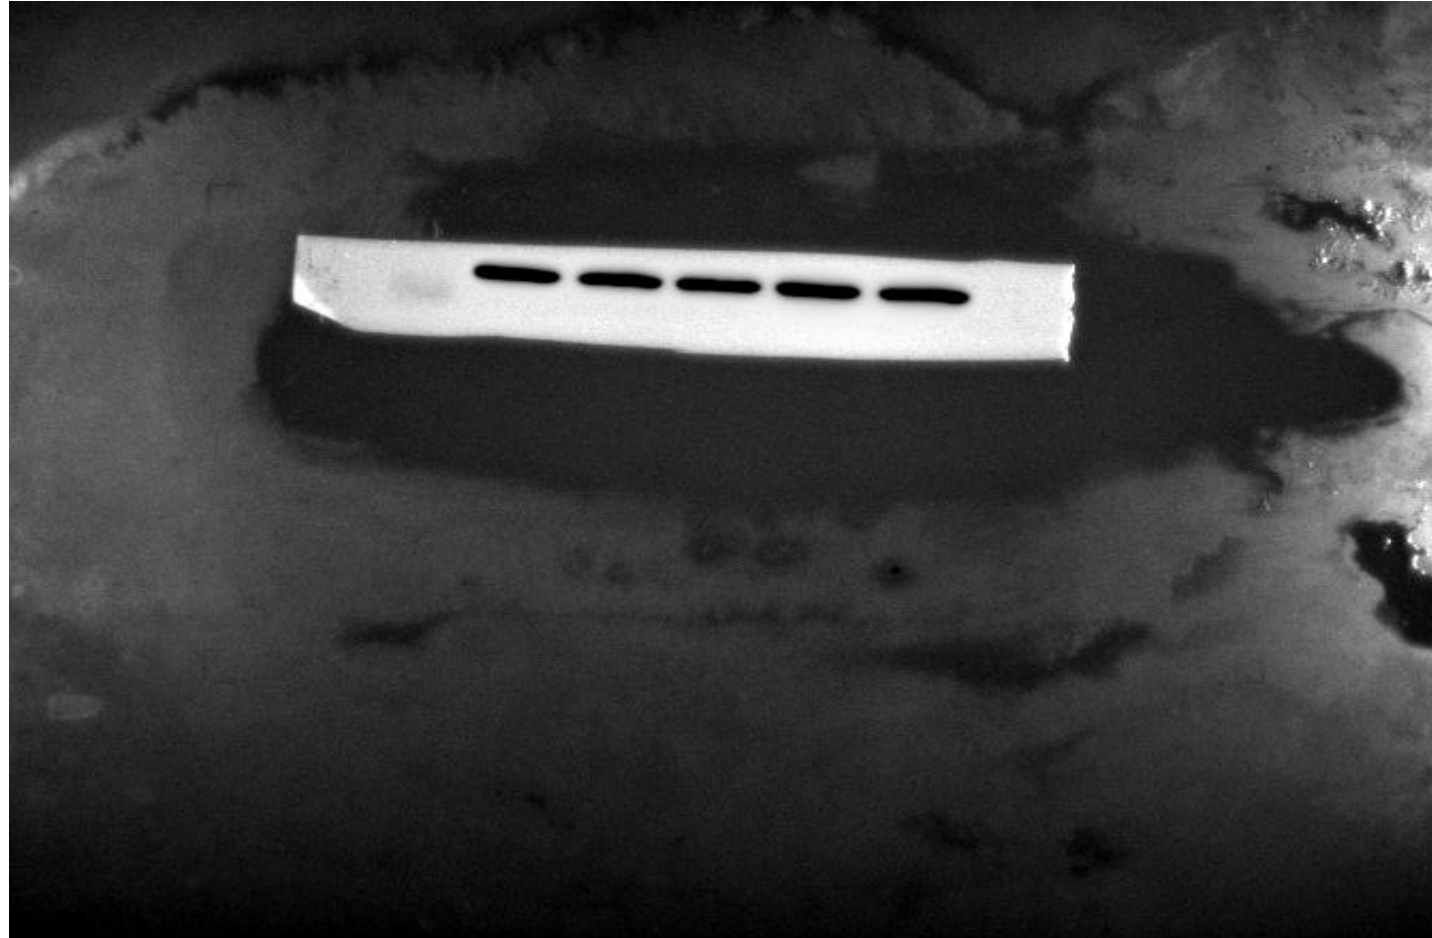

**Fig 5B**

Western blotting showed the protein expression of COX2, GPX4, SLC7A11, FTH-1 and TFR-1 in the cells of each group.

COX2

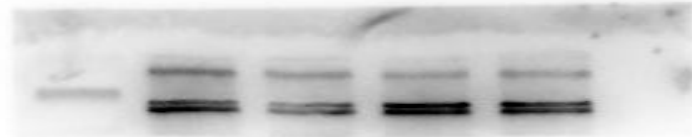

**Fig 5B**

TFR-1

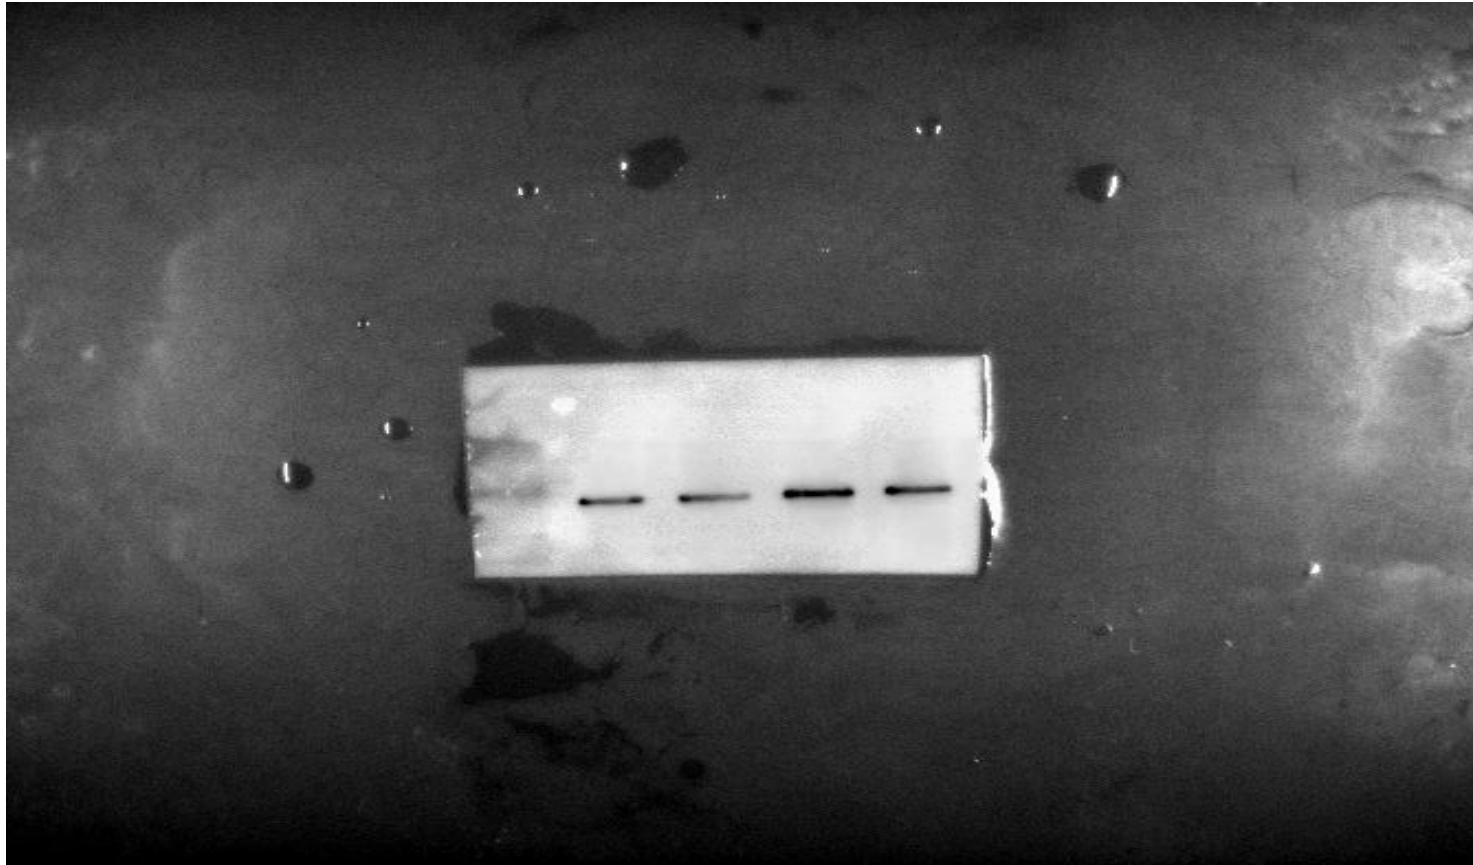

**Fig 5B**

SLC7A11

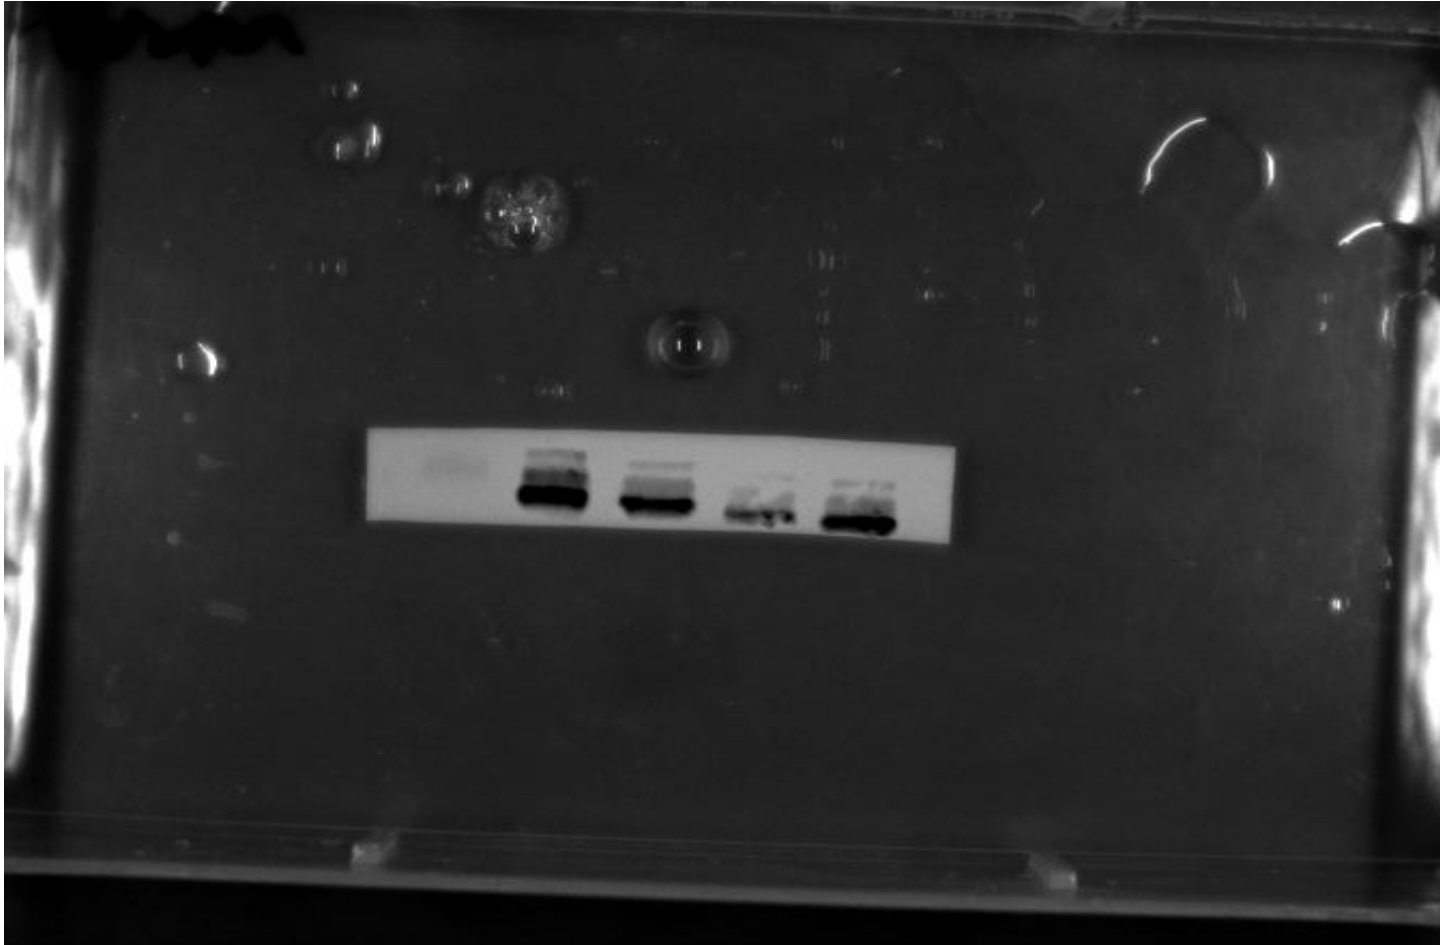

# Fig 5B

FTH-1

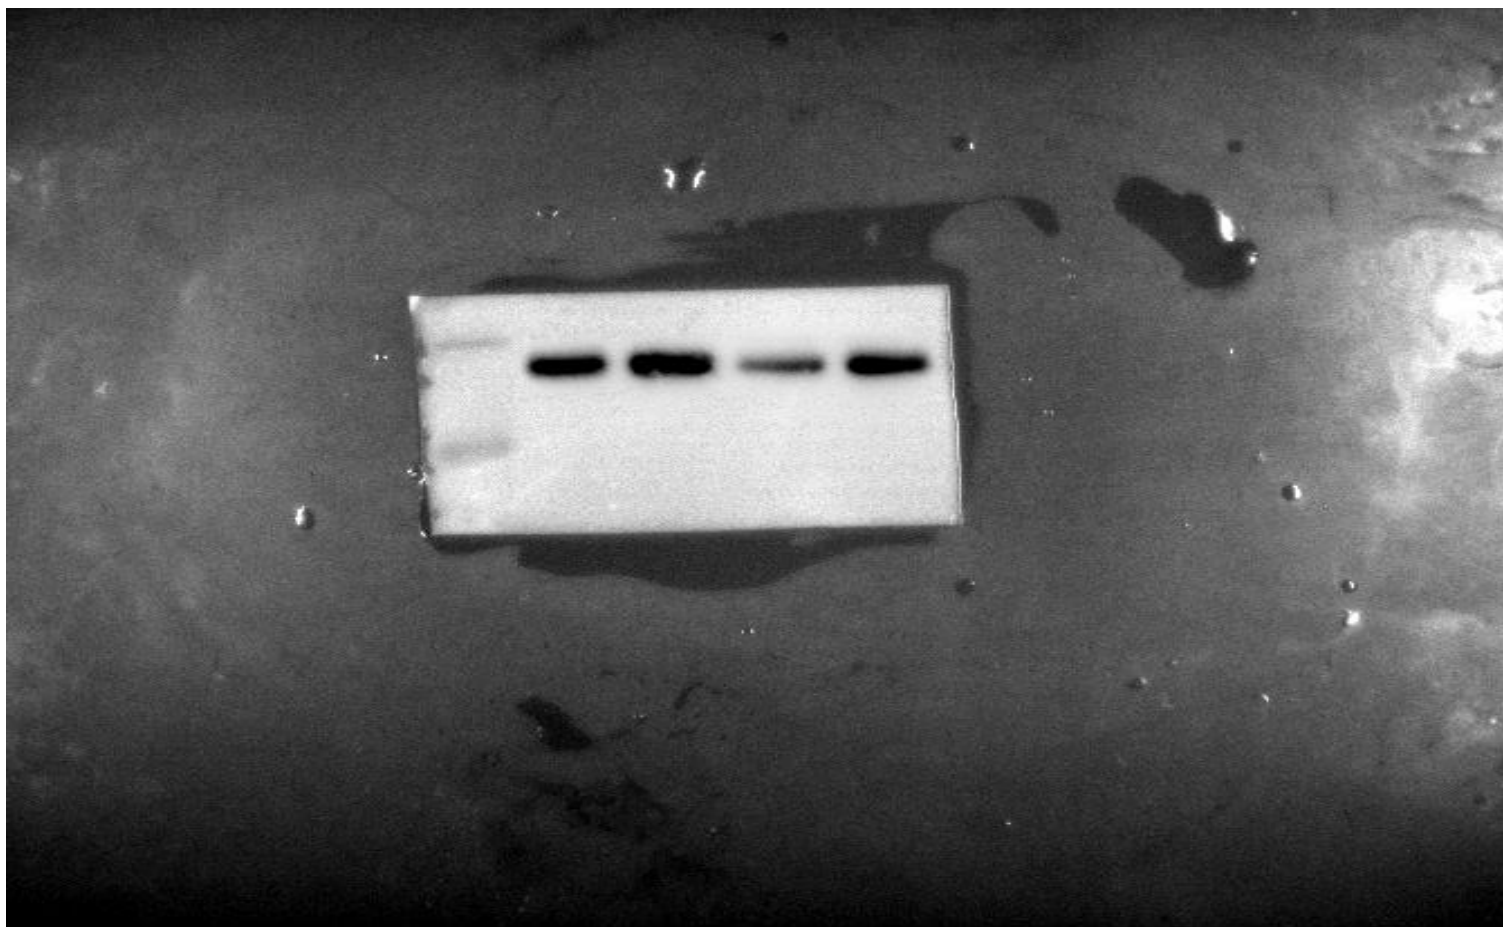

**Fig 5B**

GPX4

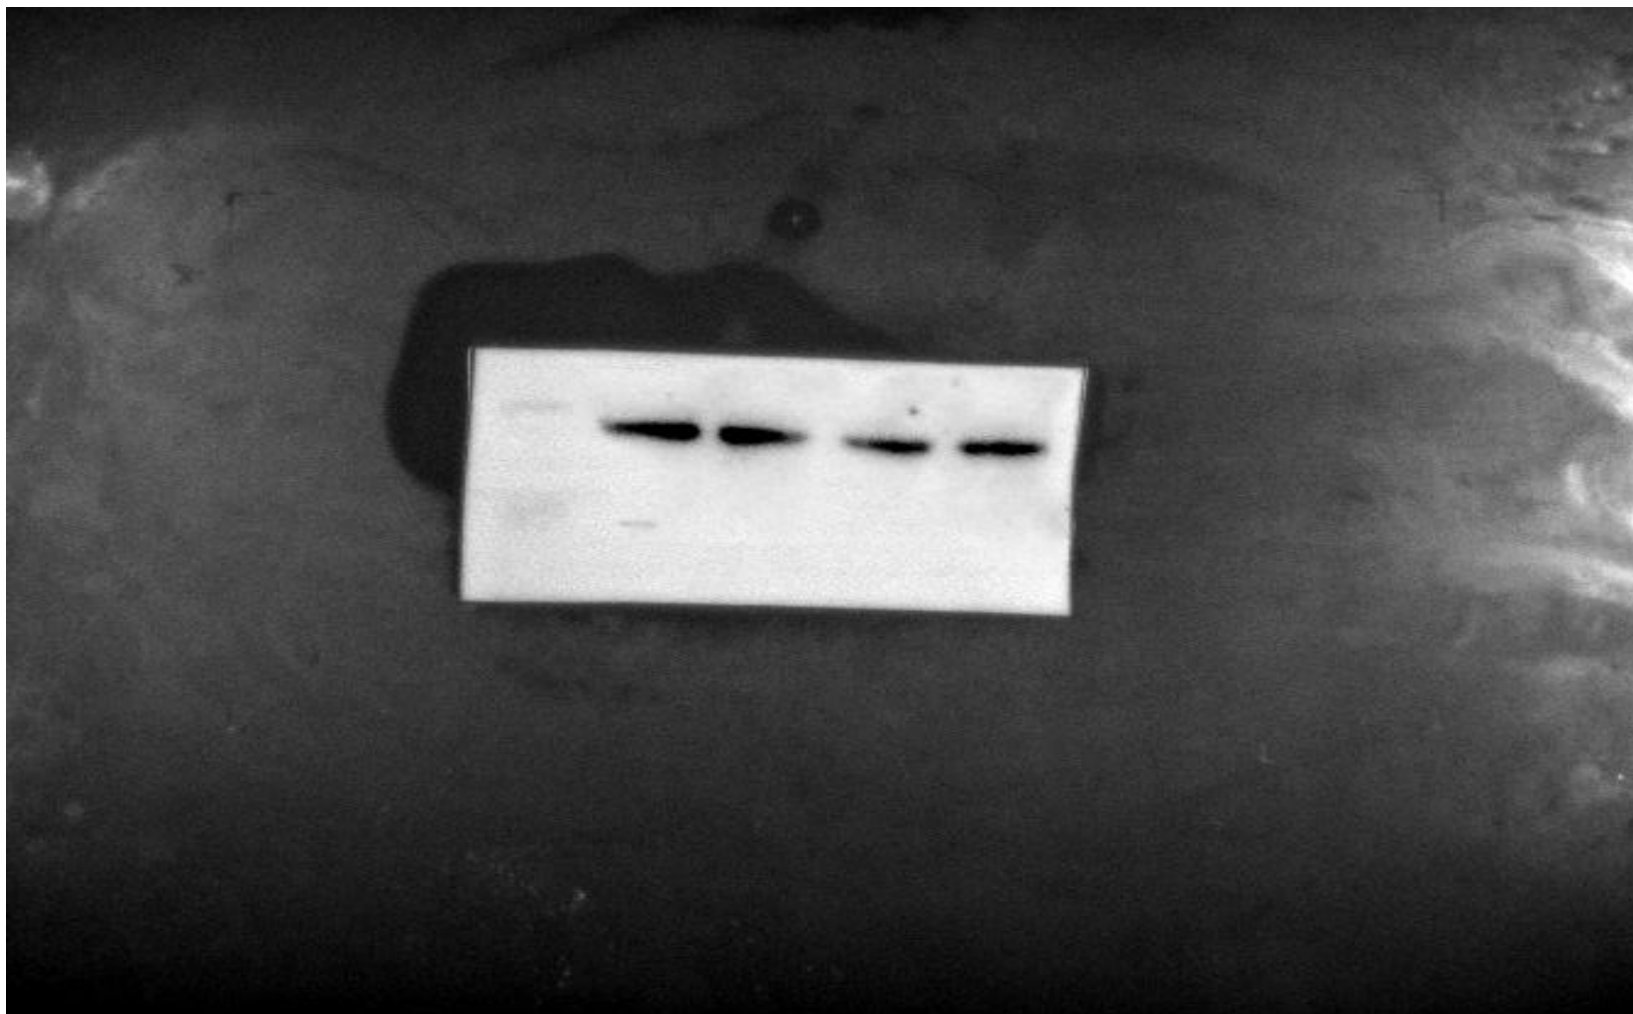

**Fig 5B**

GAPDH

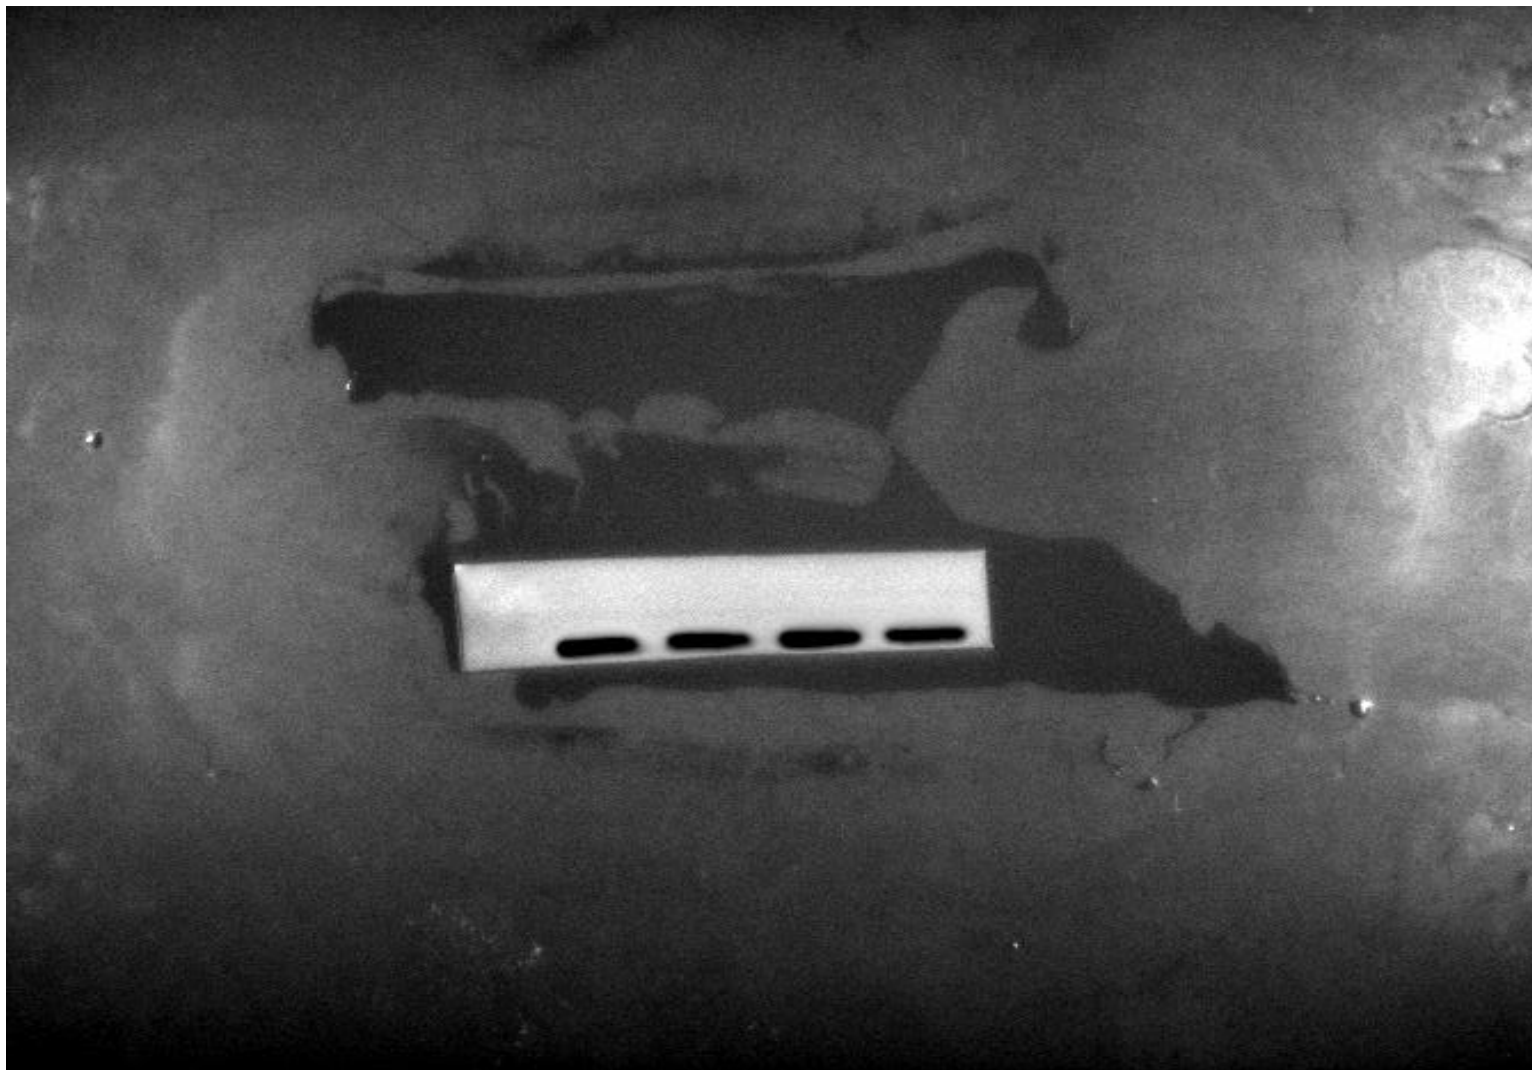



## Fig6D

Western blot analysis of SLC7A11, GPX4, FTH-1, TFR-1 and COX2 protein expression of cells in Ctrl, DMSO, RSL-3 100 nm, RSL-3 100 nm+Fer-1 400 nm, RSL-3 100 nm+AS400  $\mu$ m and AS 400  $\mu$ m groups.

COX2

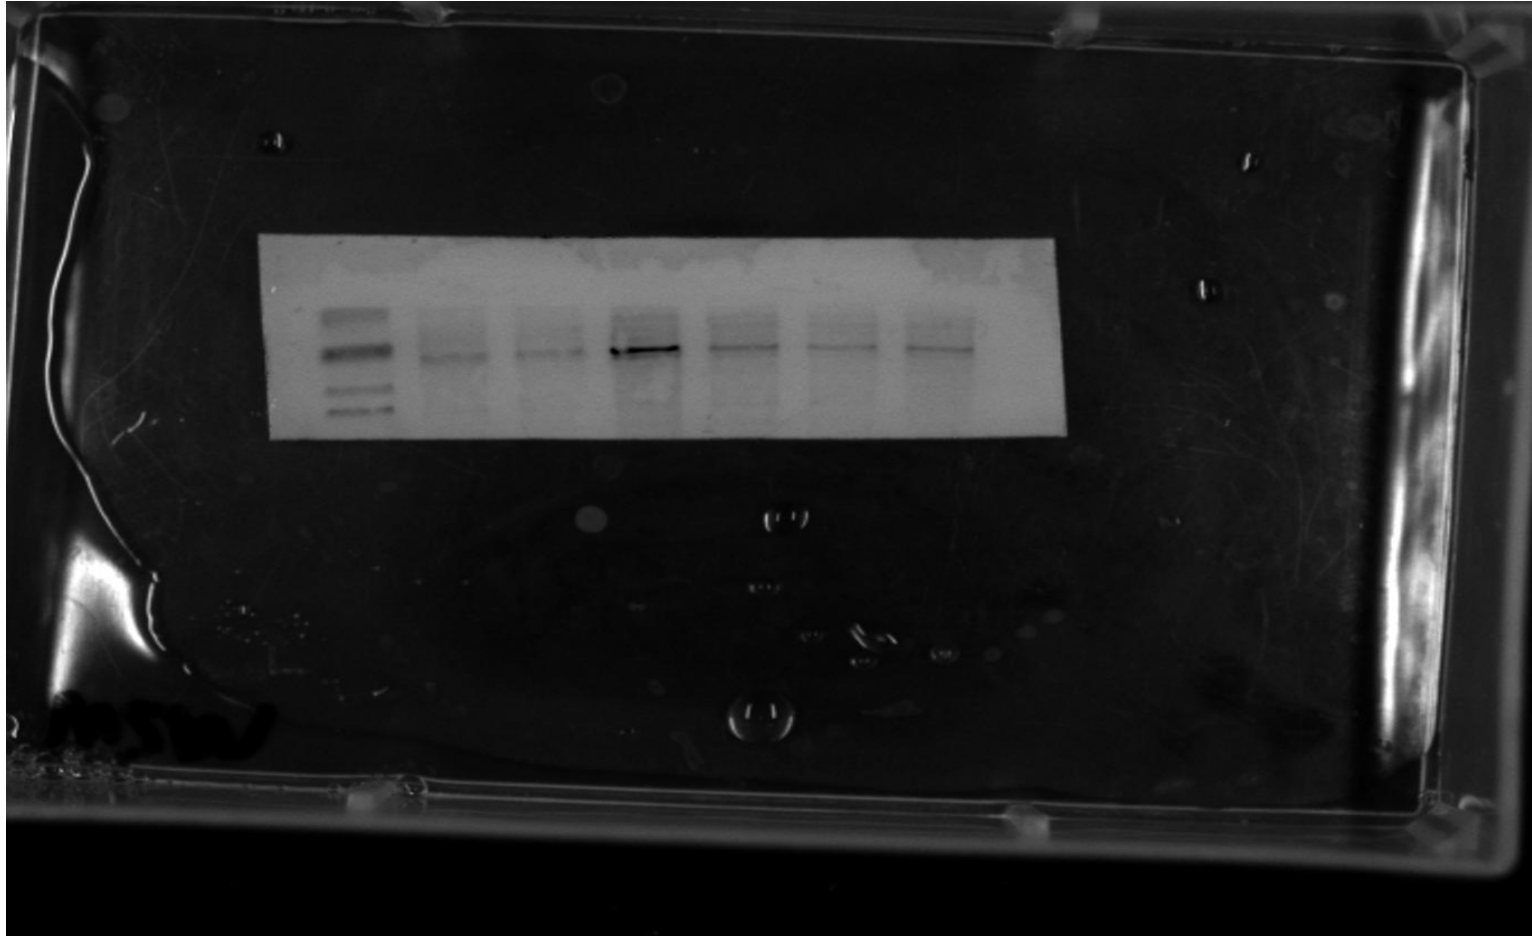

# Fig6D

TFR-1

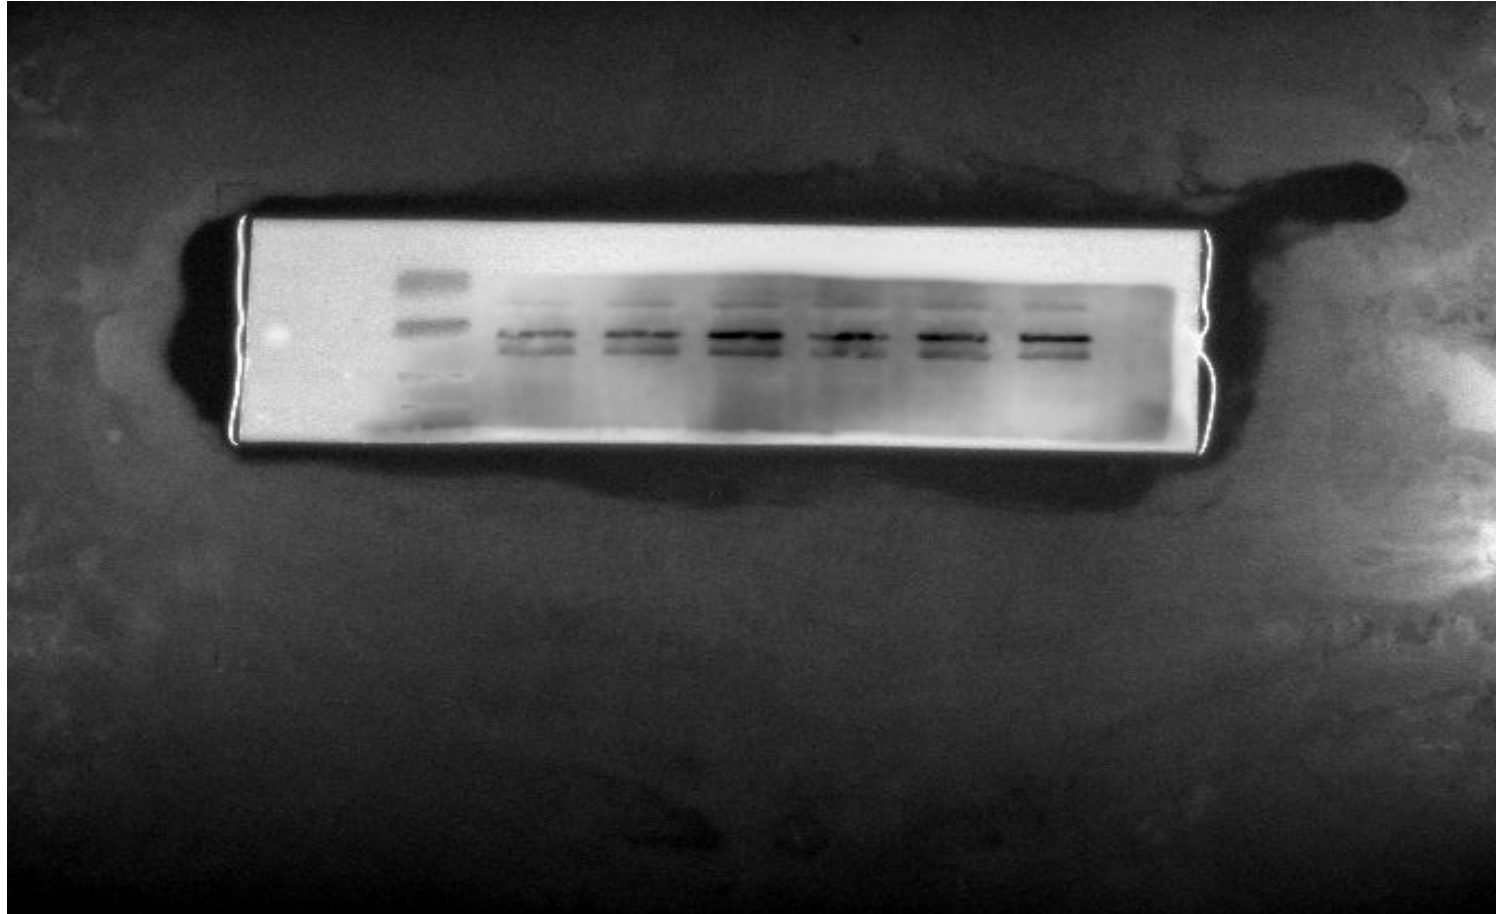

# Fig6D

SLC7A11

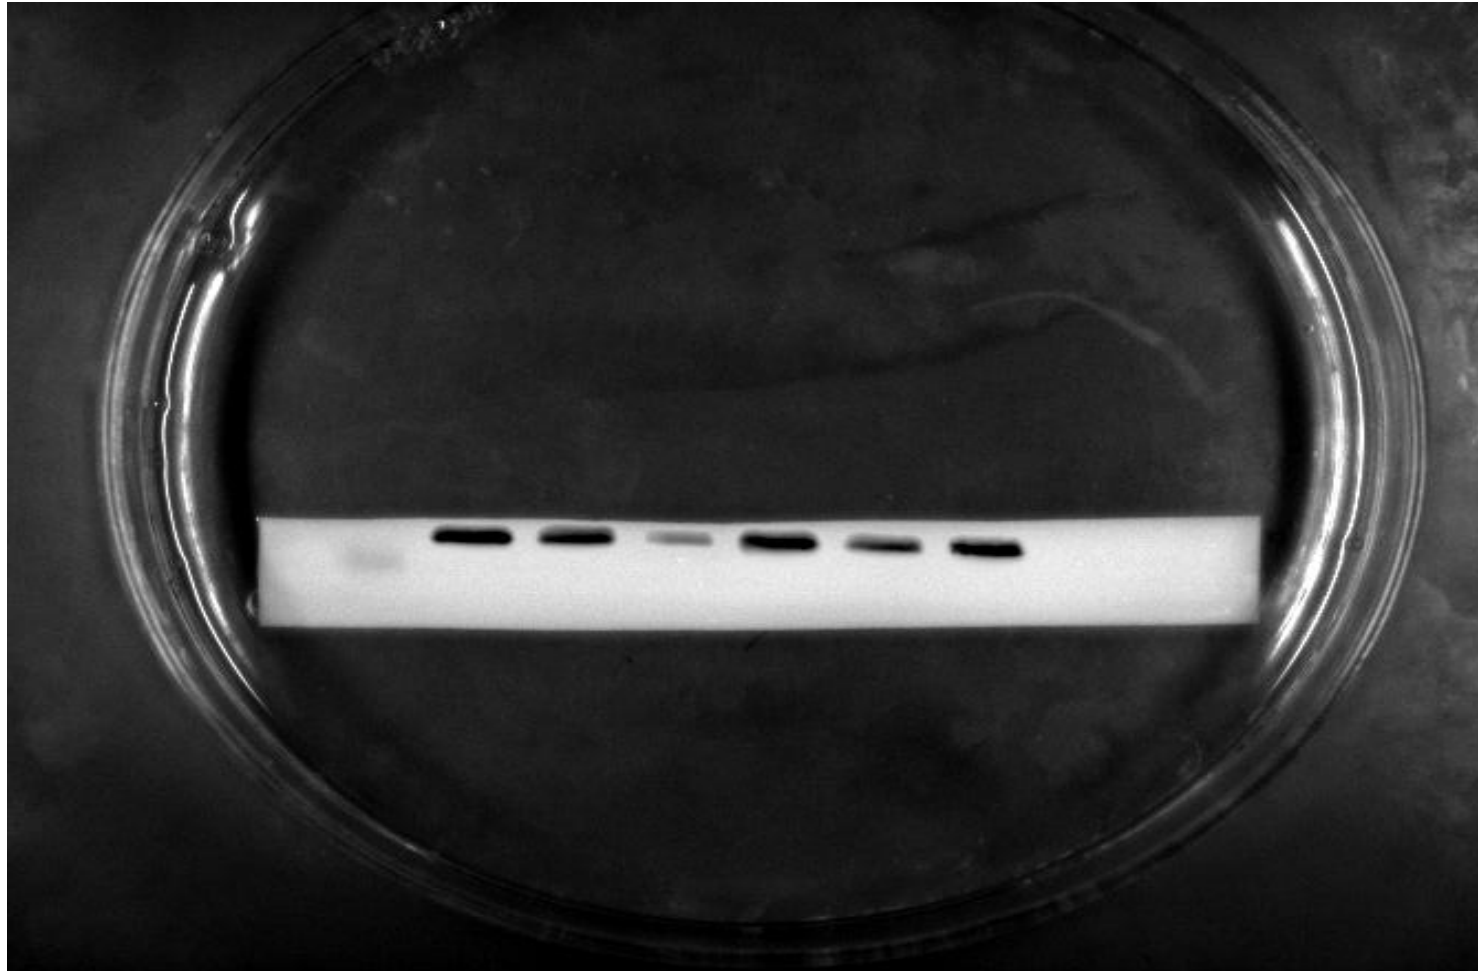

**Fig6D**

FTH-1

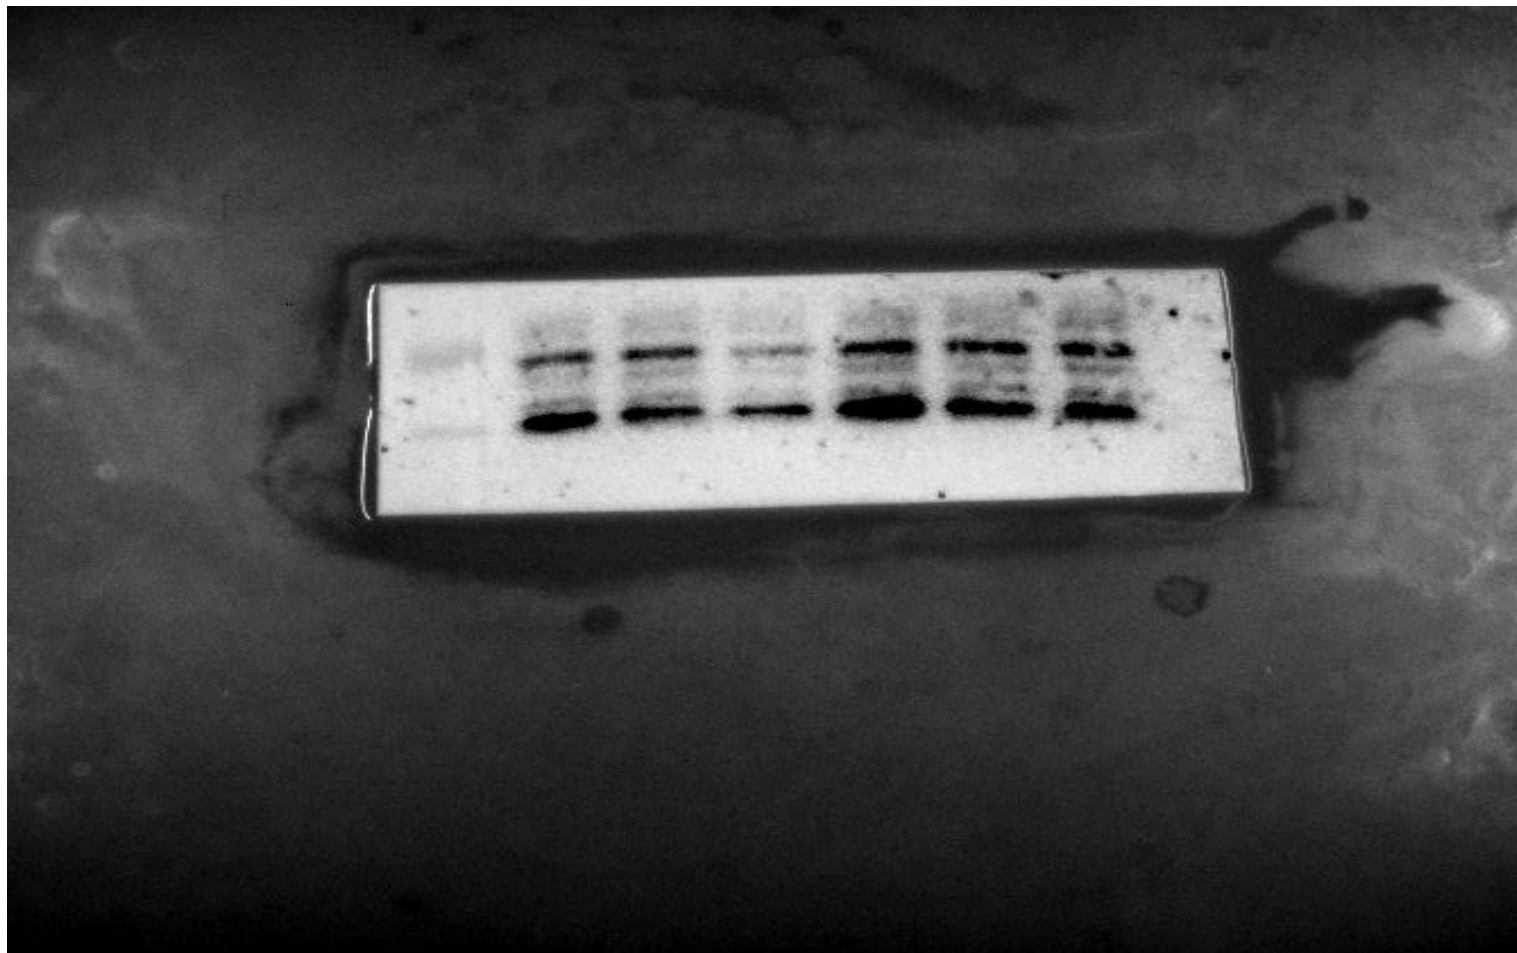

**Fig6D**

GPX4

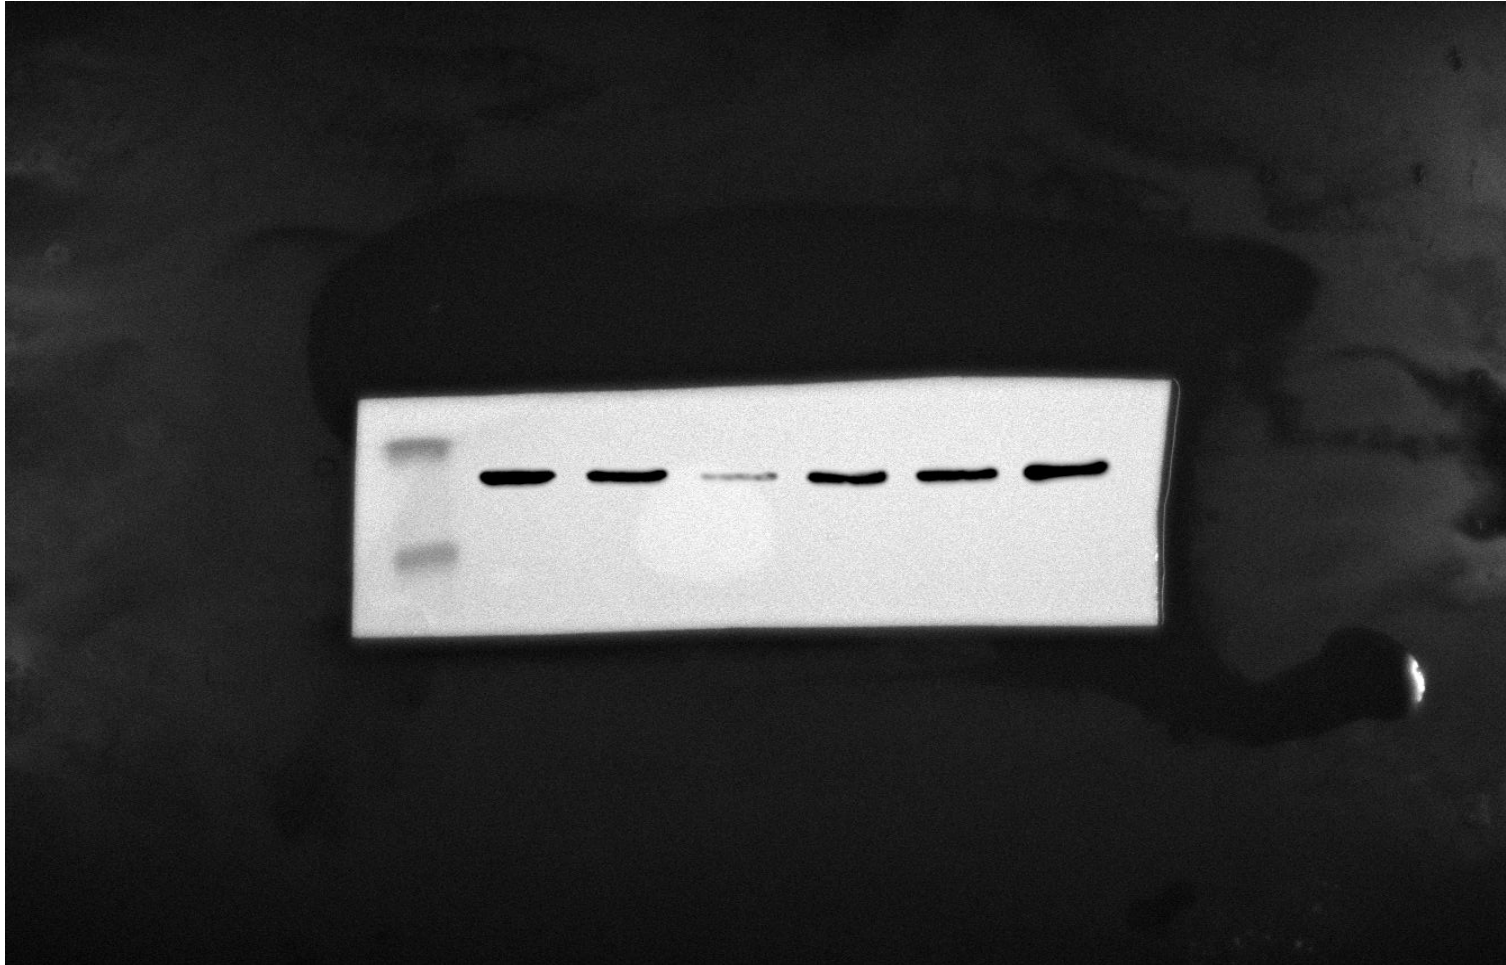

**Fig6D**

GAPDH

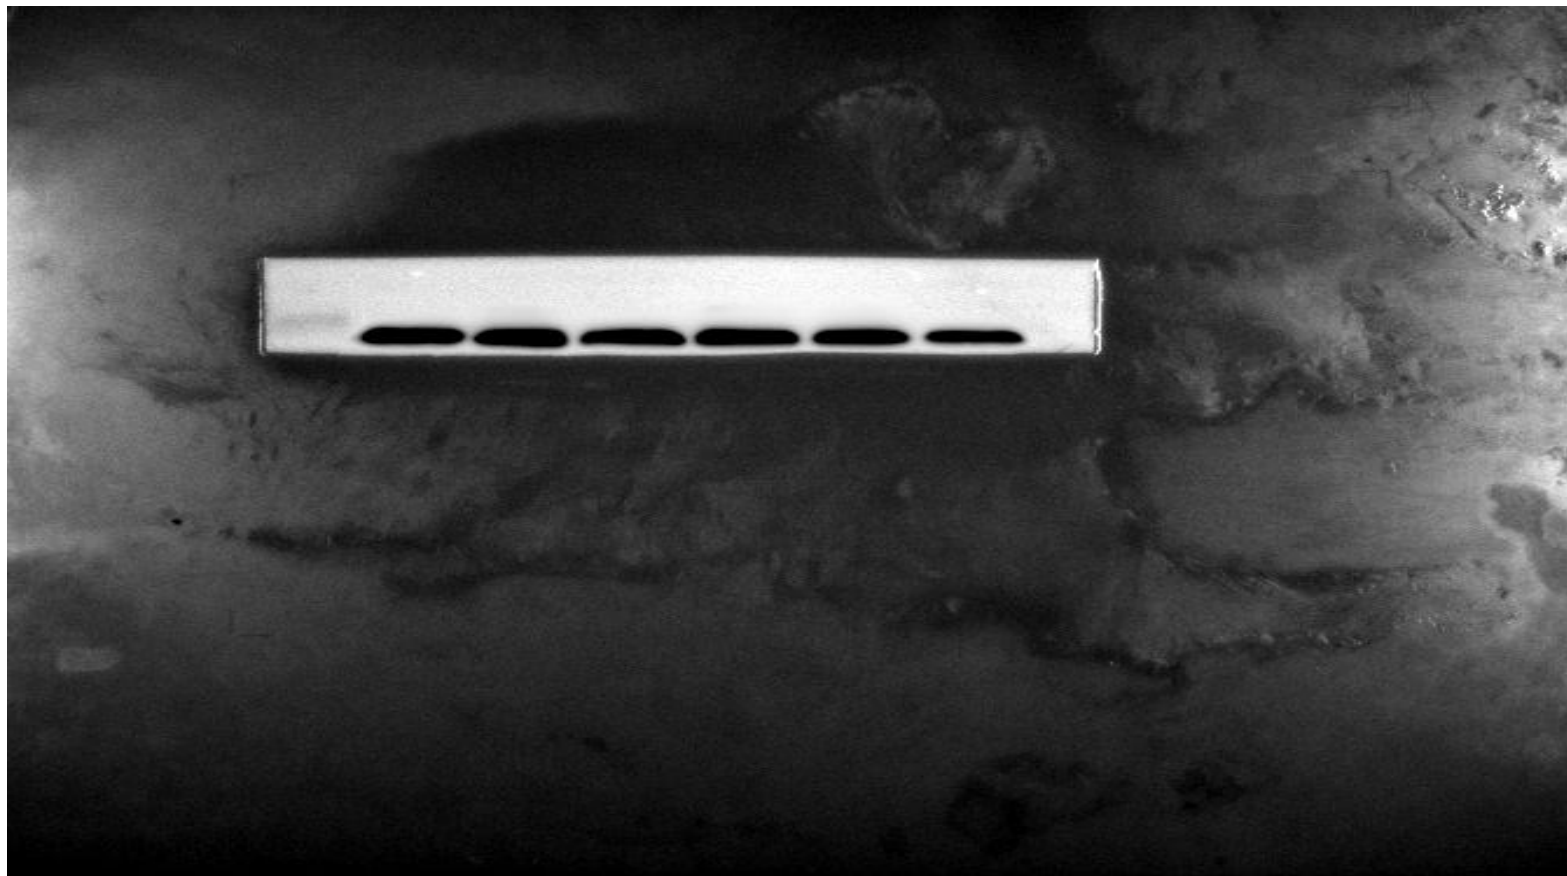

**Fig7C**

Western blotting results of COX2, GPX4, SLC7A11, FTH-1 and TFR-1 in cells in each group.

COX2

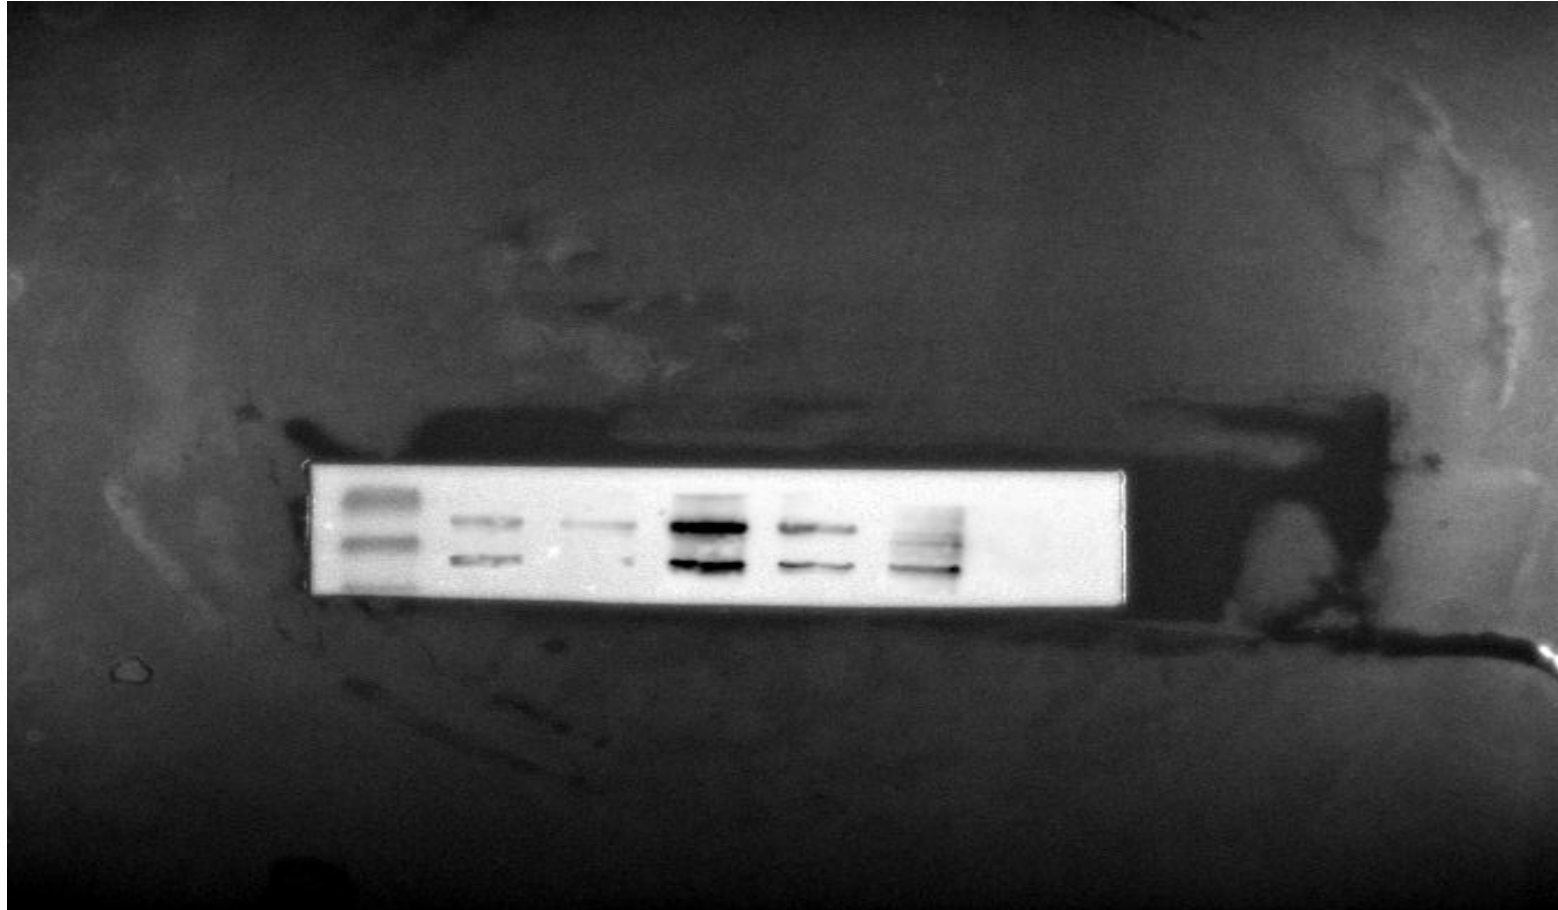

**Fig7C**

TFR-1

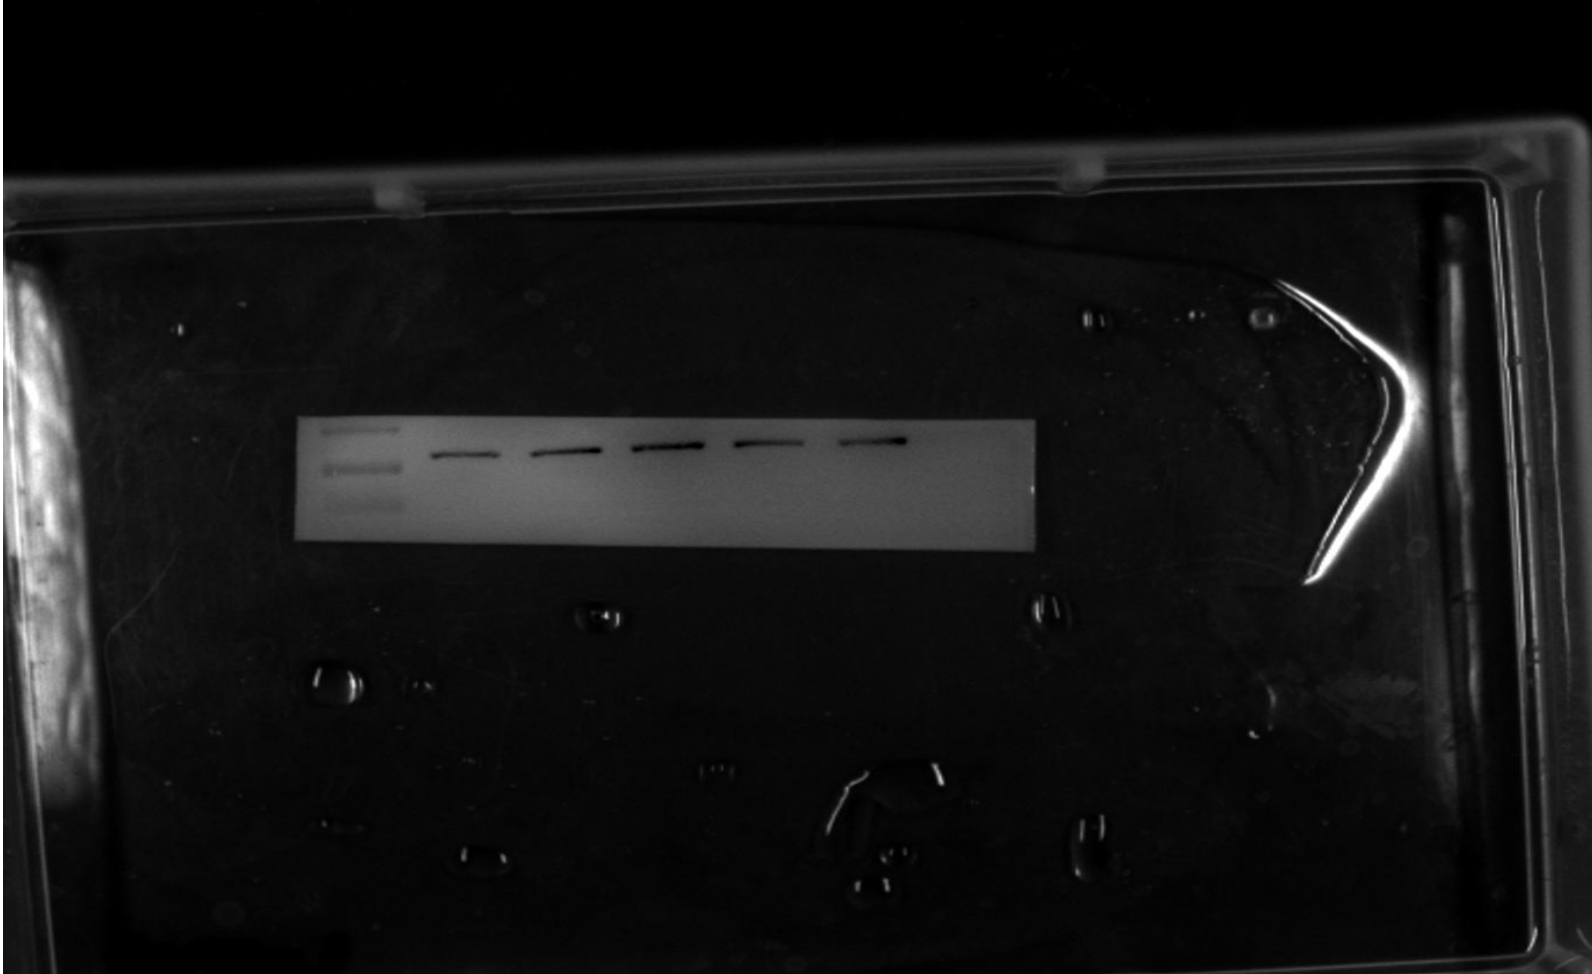



**Fig7C**

SLC7A11

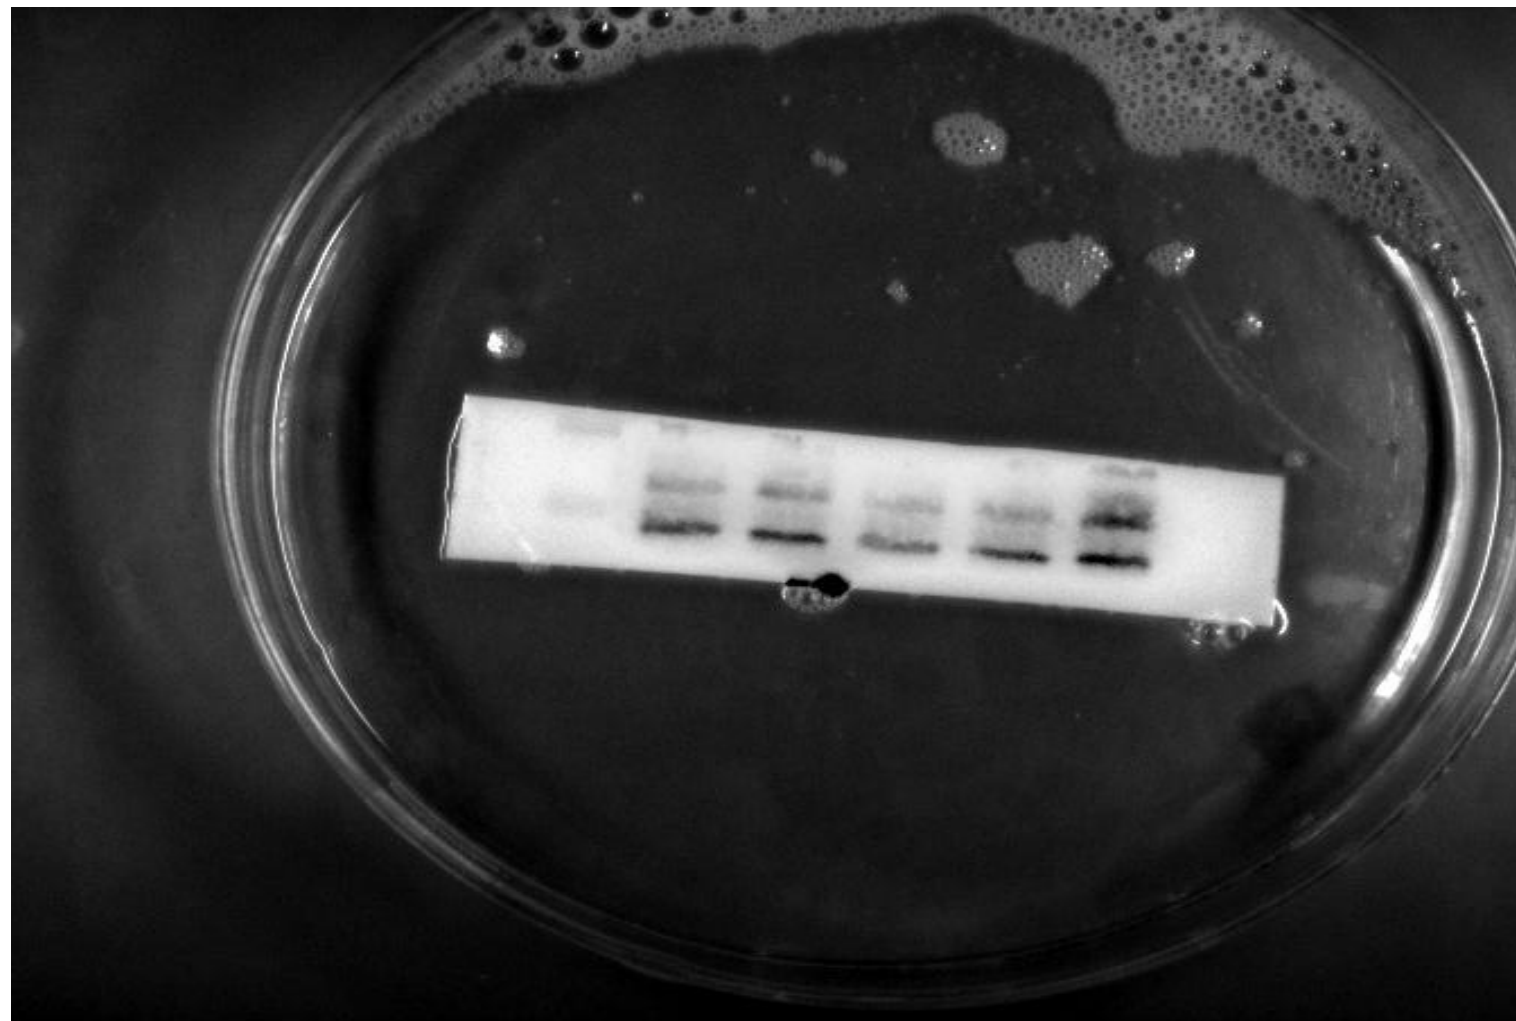

**Fig7C**

FTH-1

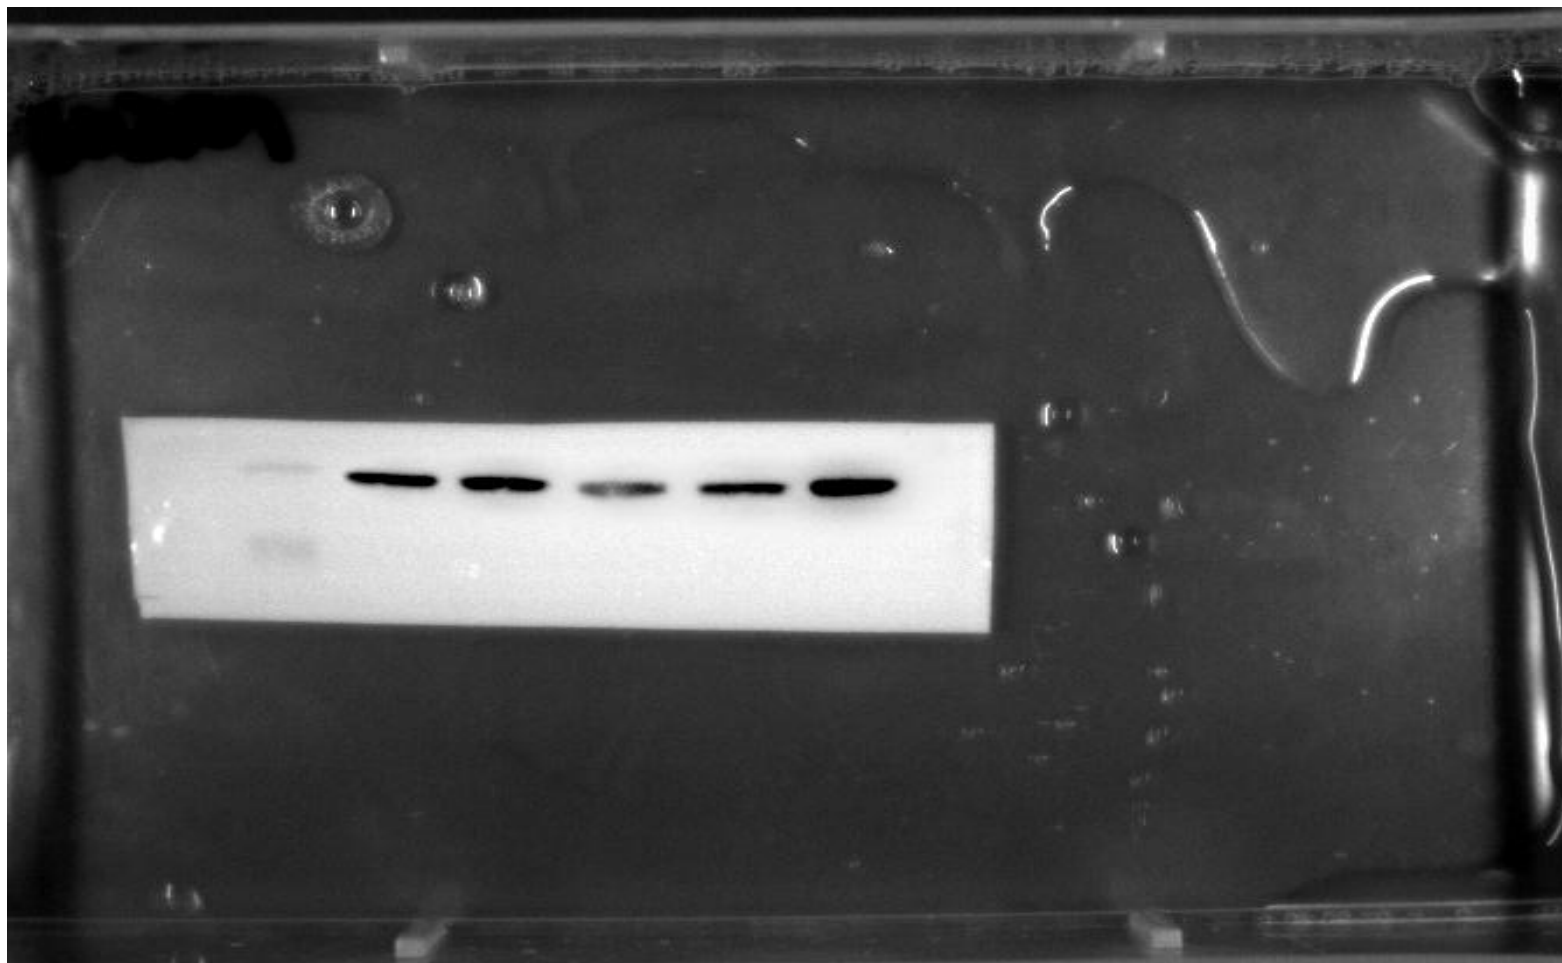

**Fig7C**

GPX4

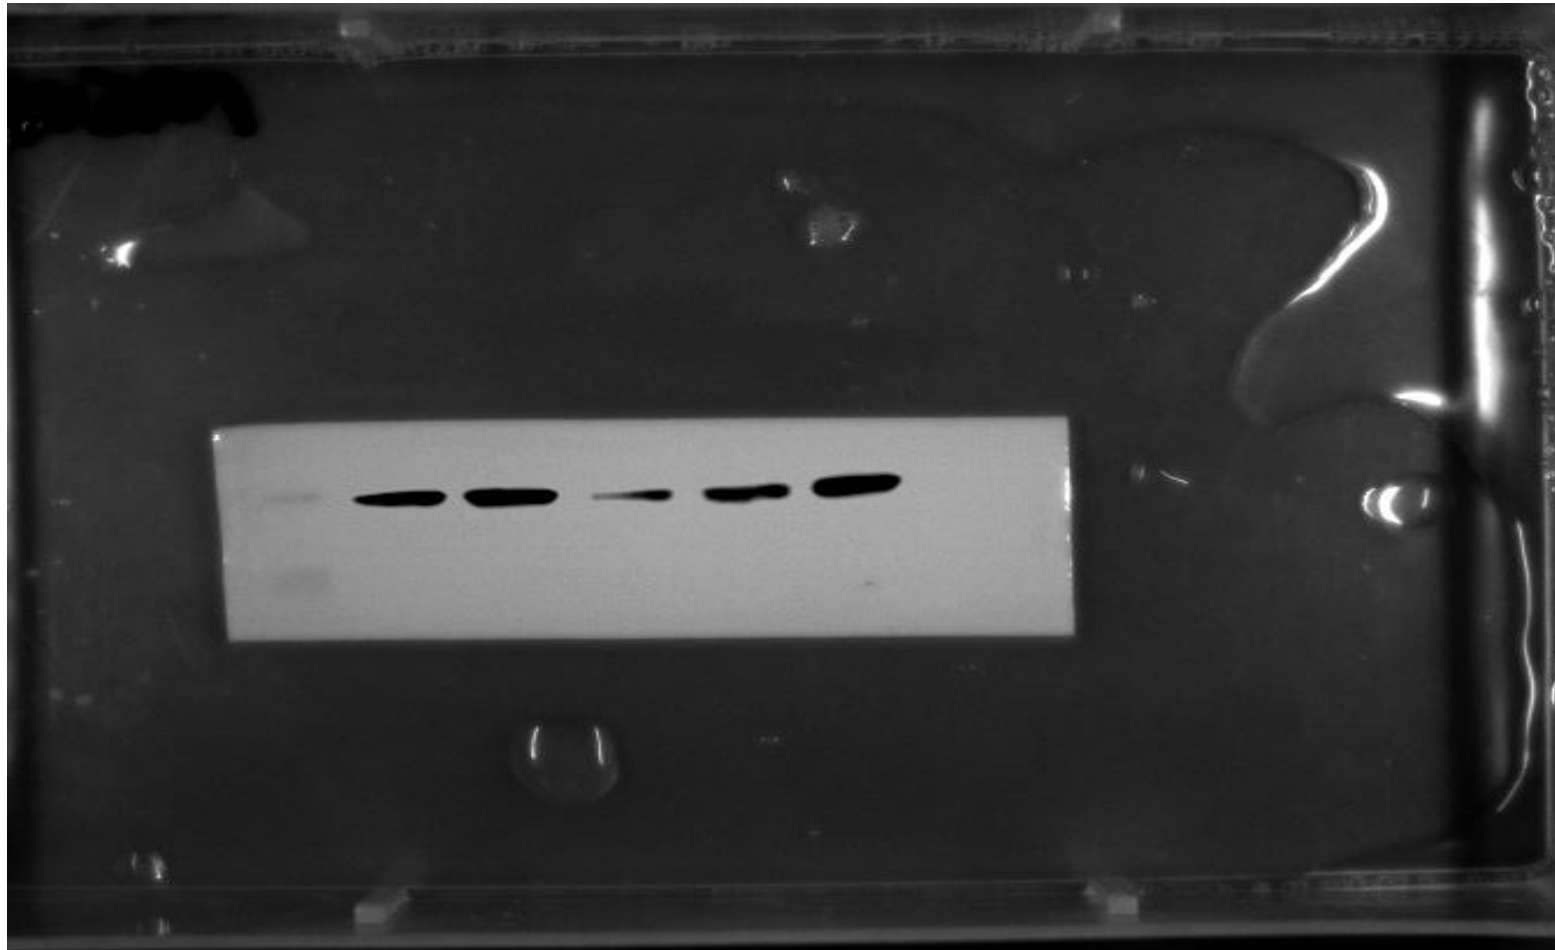

**Fig7C**

GAPDH

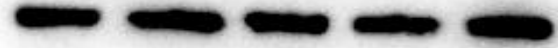

**Fig9B**

**Western blot analysis of GPX4, SLC7A11, FTH-1, TFR-1 and COX2 in the kidneys of nondiabetic, diabetic control and diabetic mice treated with AS.**

COX2

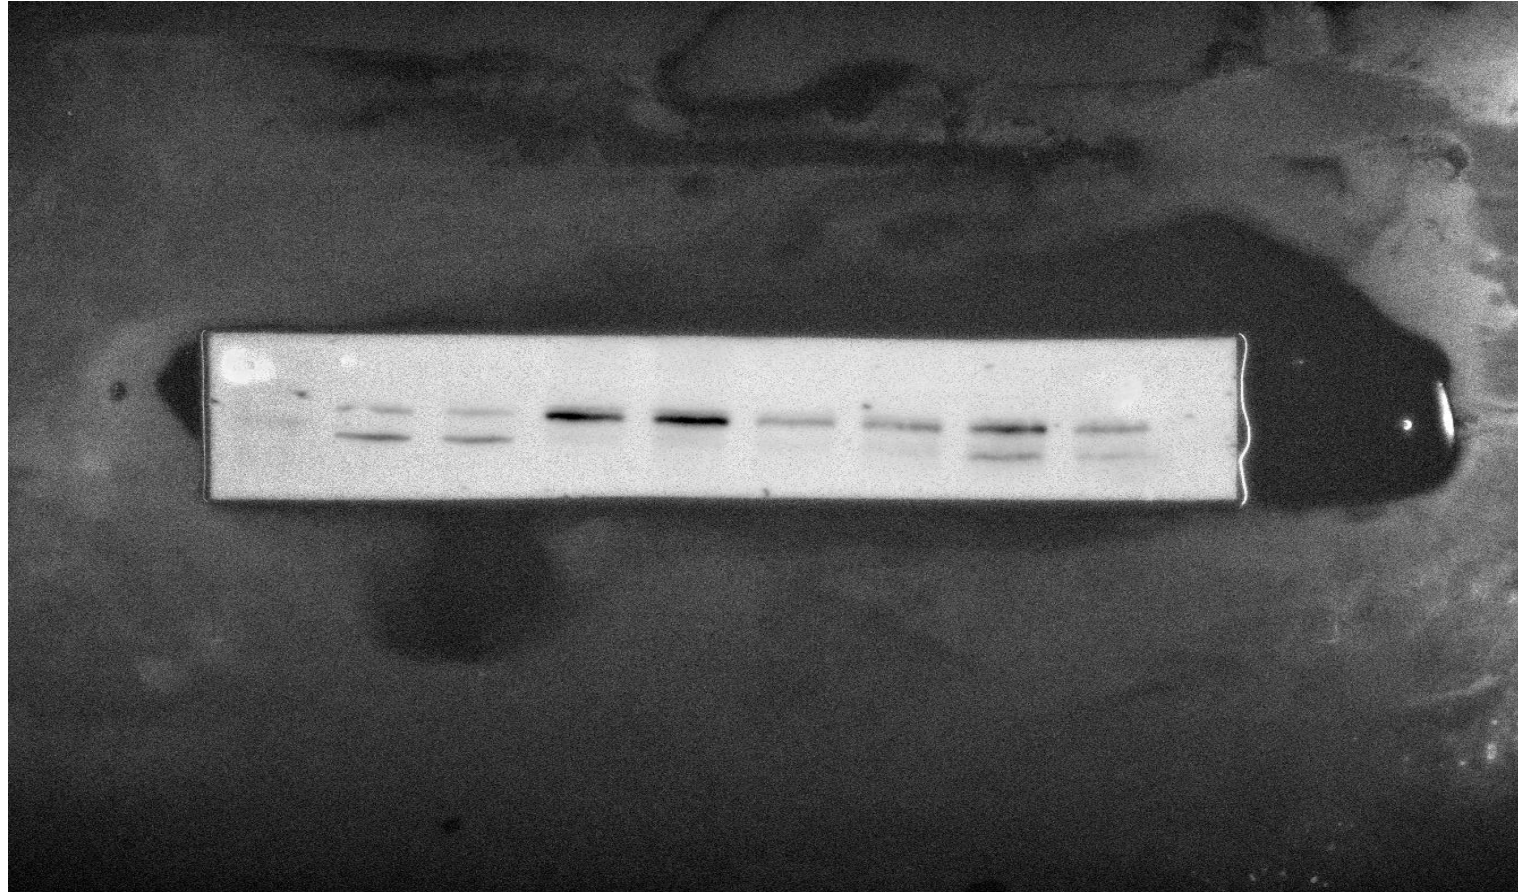

**Fig9B**

TFR-1

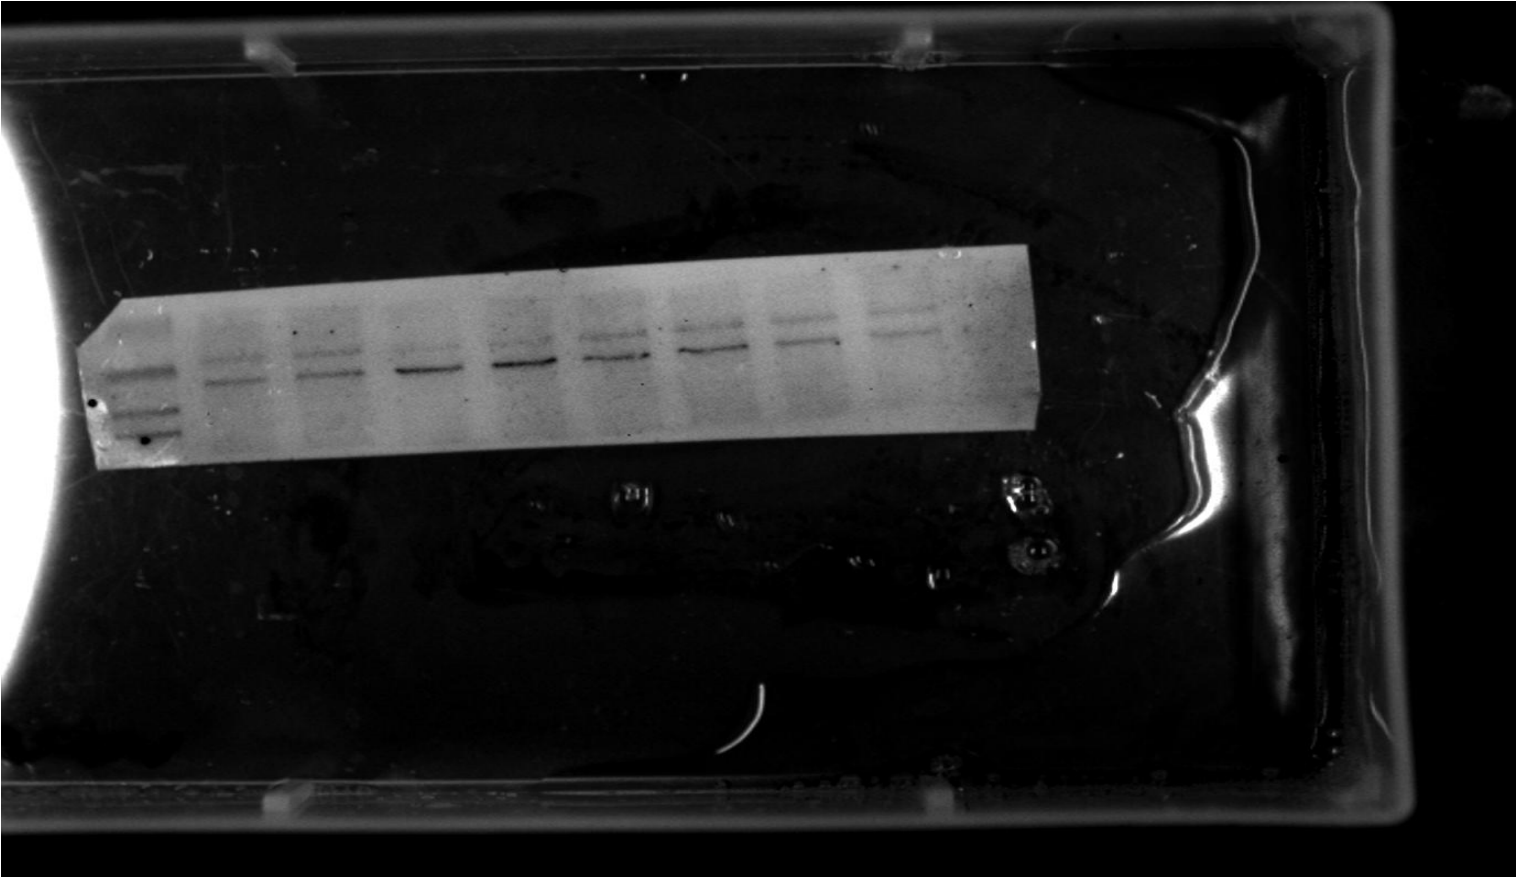

# Fig9B

SLC7A11

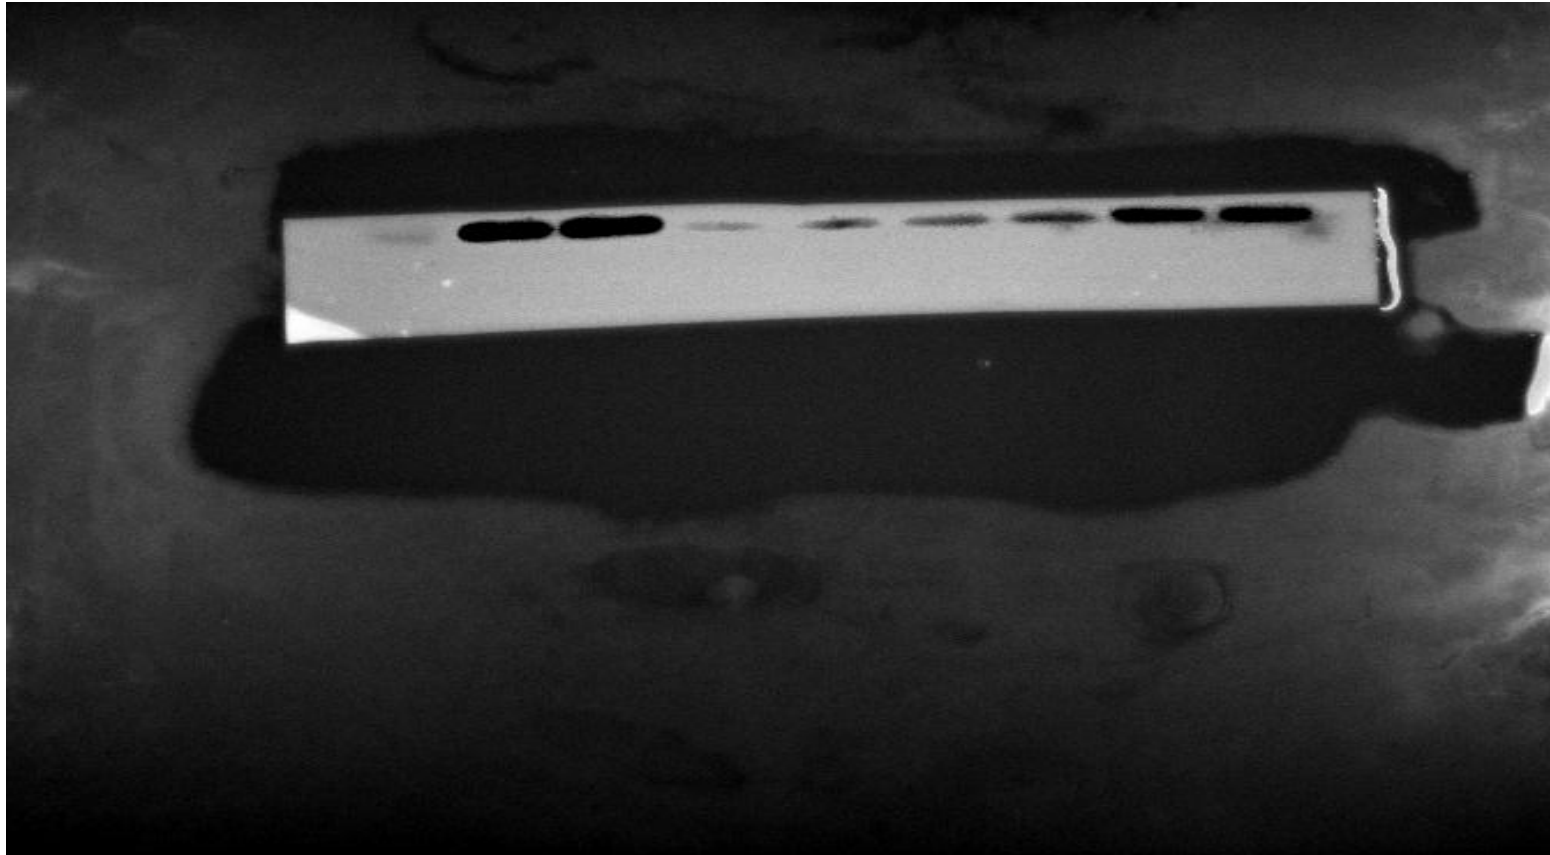

**Fig9B**

FTH-1

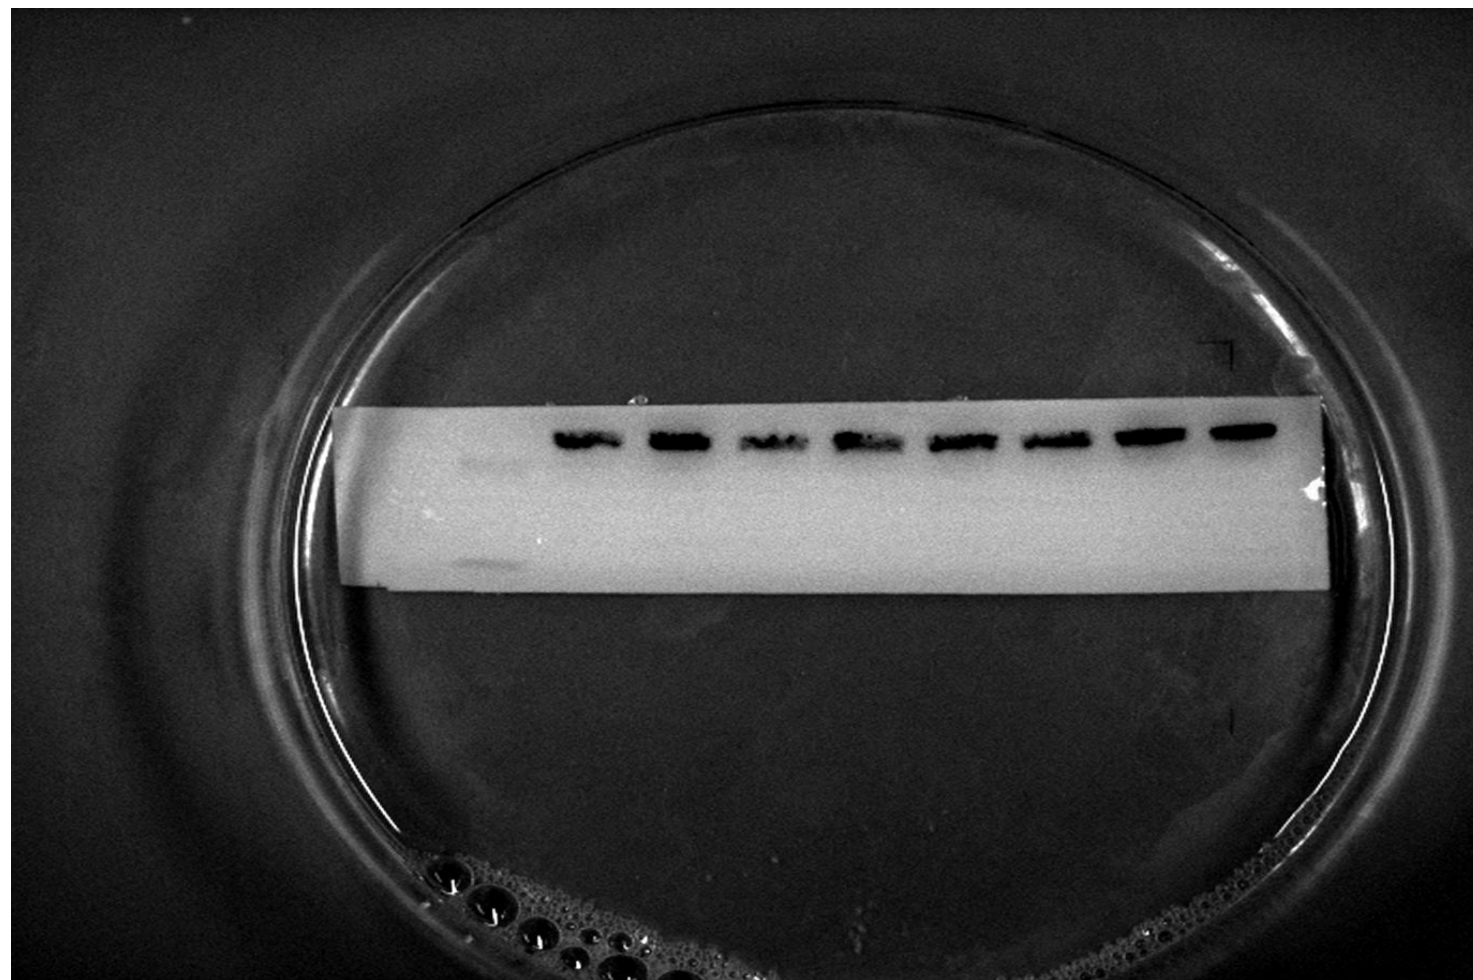



**Fig9B**

GPX4

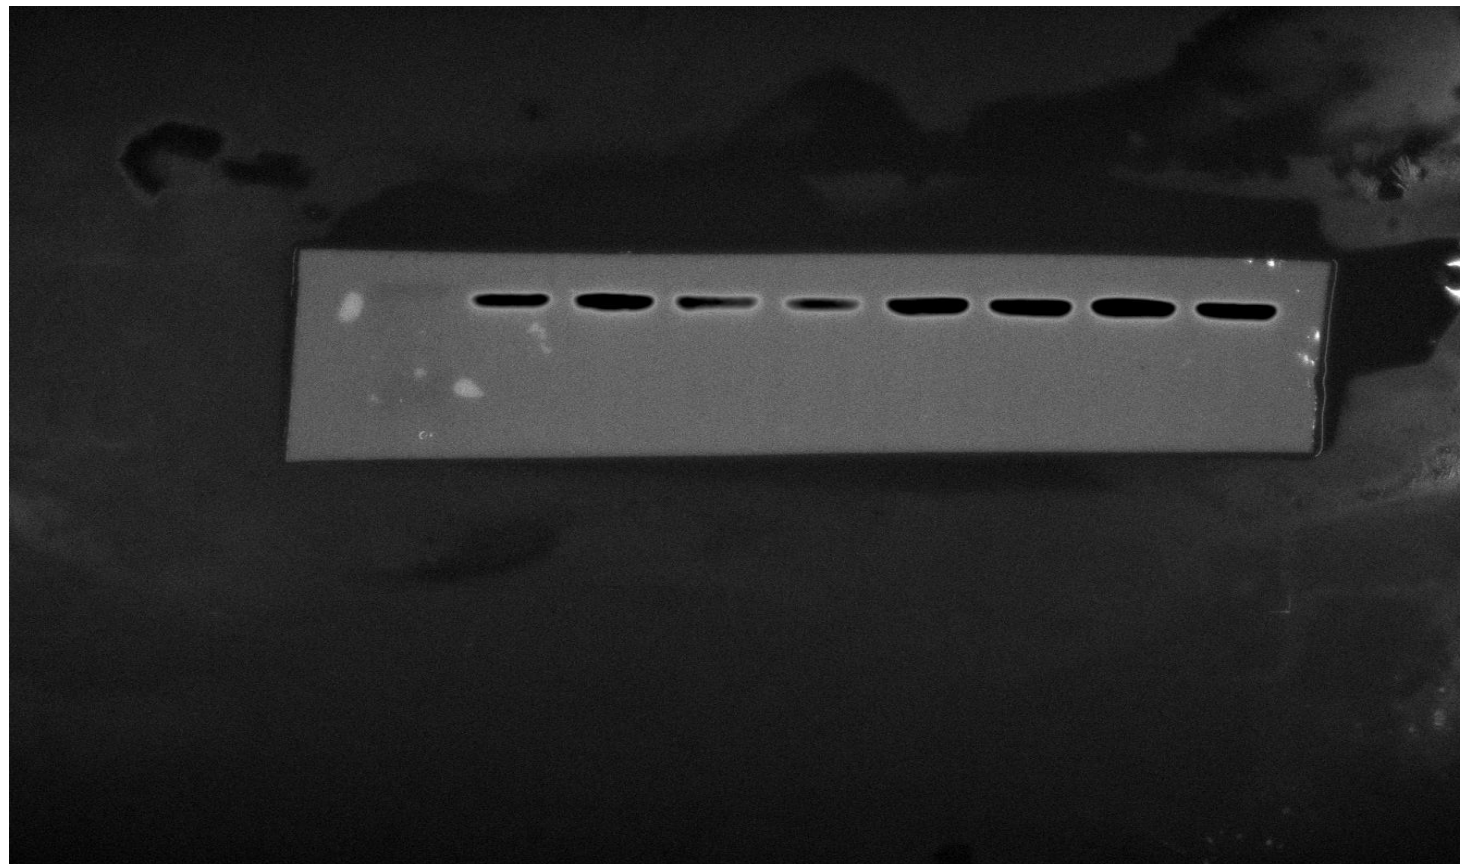

**Fig9B**

GAPDH

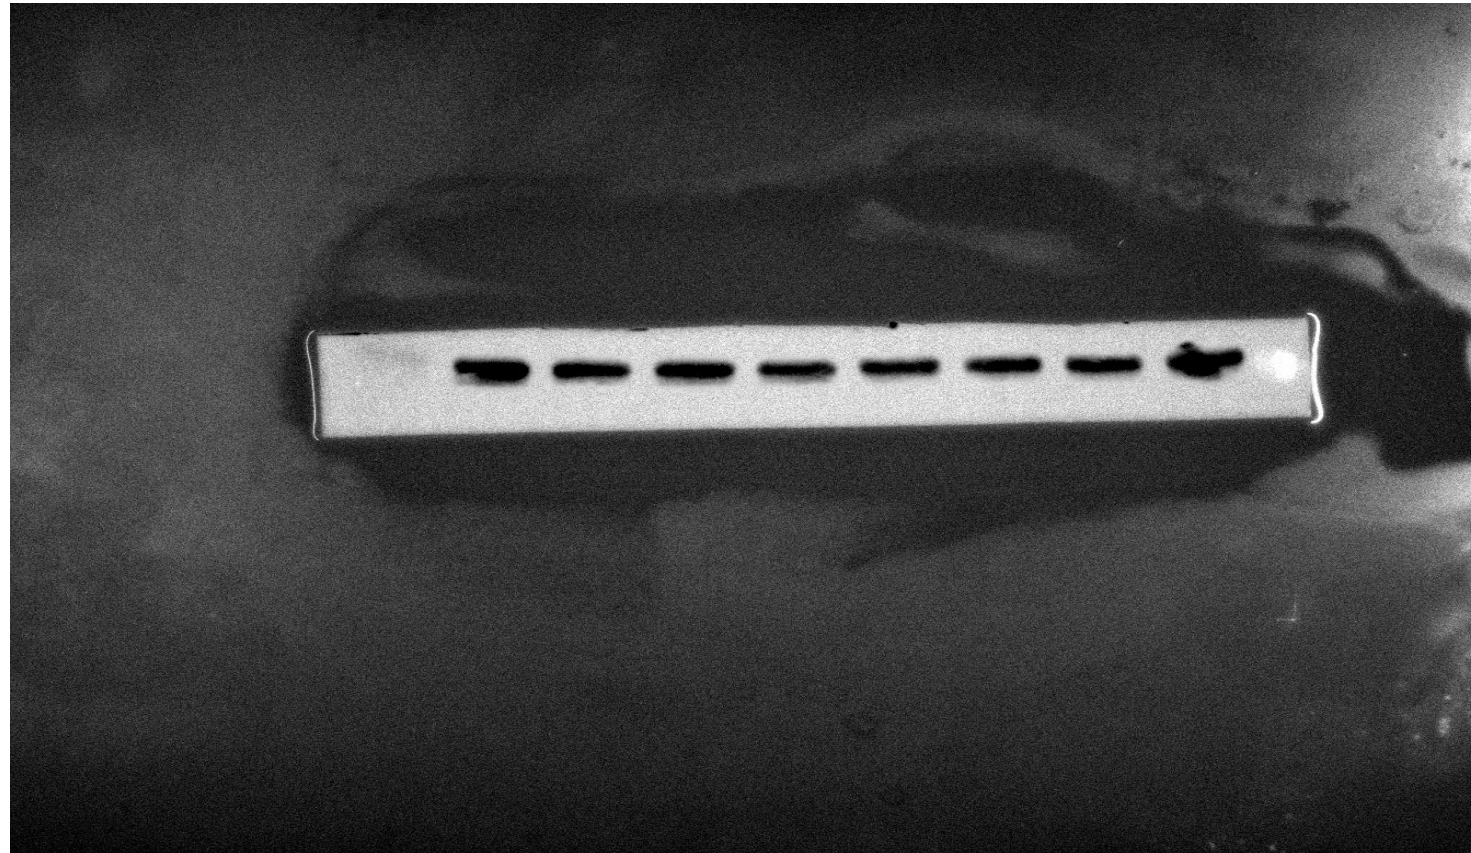

Supplement: pone.0279010.s002.pdf [file pone.0279010.s002.pdf]
